# Supplementary material
Source: publisher figshare collection journal article supplement (https://acs.figshare.com/ndownloader/files/4276270)
Supplement: Supplementary file 1 [file 4276270]

## Supporting Information for

### Schicagenins A–C: Three Cage-like Nortriterpenoids from Leaves and Stems of *Schisandra chinensis*

Yi-Ming Shi,<sup>†,‡</sup> Xing-Yao Li<sup>†,‡</sup> Xiao-Nian Li,<sup>†</sup> Xiao Luo,<sup>†</sup> Yong-Bo Xue,<sup>†,‡</sup> Cheng-Qin Liang,<sup>†,‡</sup> Juan Zou,<sup>†,‡</sup> Ling-Mei Kong,<sup>†,‡</sup>  
Jian-Xin Pu,<sup>†</sup> Yan Li,<sup>†</sup> Wei-Lie Xiao,<sup>\*,†</sup> and Han-Dong Sun<sup>\*,†</sup>

*State Key Laboratory of Phytochemistry and Plant Resources in West China, Kunming Institute of Botany, Chinese Academy of Sciences, Kunming 650204, Yunnan, P. R. China; Graduate School of the Chinese Academy of Sciences, Beijing 100039, P. R. China.*

*xwl@mail.kib.ac.cn and hdsun@mail.kib.ac.cn*

---

\* Corresponding author. Phone: (86) 871-5223251. Fax:  
(86) 871-5216343

<sup>†</sup> Kunming Institute of Botany

<sup>‡</sup> Graduate School of the Chinese Academy of Sciences

## Contents of Supporting Information

| No. | Contents                                                                               | Page | No. | Contents                                                                               | Page |
|-----|----------------------------------------------------------------------------------------|------|-----|----------------------------------------------------------------------------------------|------|
| 1   | Detailed experimental procedures                                                       | 3    | 18  | Figure S16. ROESY spectrum of schicagenin B ( <b>2</b> )                               | 22   |
| 2   | Table S1. <sup>1</sup> H NMR assignments of schicagenins A–C ( <b>1–3</b> )            | 6    | 19  | Figure S17. HRESIMS spectrum of schicagenin B ( <b>2</b> )                             | 23   |
| 3   | Figure S1. <sup>1</sup> H NMR spectrum of schicagenin A ( <b>1</b> )                   | 7    | 20  | Figure S18. IR spectrum of schicagenin B ( <b>2</b> )                                  | 24   |
| 4   | Figure S2. <sup>13</sup> C NMR spectrum of schicagenin A ( <b>1</b> )                  | 8    | 21  | Figure S19. UV spectrum of schicagenin B ( <b>2</b> )                                  | 25   |
| 5   | Figure S3. HSQC spectrum of schicagenin A ( <b>1</b> )                                 | 9    | 22  | Figure S20. CD spectrum of schicagenin B ( <b>2</b> )                                  | 26   |
| 6   | Figure S4. HMBC spectrum of schicagenin A ( <b>1</b> )                                 | 10   | 23  | Figure S21. <sup>1</sup> H NMR spectrum of schicagenin C ( <b>3</b> )                  | 27   |
| 7   | Figure S5. <sup>1</sup> H– <sup>1</sup> H COSY spectrum of schicagenin A ( <b>1</b> )  | 11   | 24  | Figure S22. <sup>13</sup> C NMR spectrum of schicagenin C ( <b>3</b> )                 | 28   |
| 8   | Figure S6. ROESY spectrum of schicagenin A ( <b>1</b> )                                | 12   | 25  | Figure S23. HSQC spectrum of schicagenin C ( <b>3</b> )                                | 29   |
| 9   | Figure S7. HRESIMS spectrum of schicagenin A ( <b>1</b> )                              | 13   | 26  | Figure S24. HMBC spectrum of schicagenin C ( <b>3</b> )                                | 30   |
| 10  | Figure S8. IR spectrum of schicagenin A ( <b>1</b> )                                   | 14   | 27  | Figure S25. <sup>1</sup> H– <sup>1</sup> H COSY spectrum of schicagenin C ( <b>3</b> ) | 31   |
| 11  | Figure S9. UV spectrum of schicagenin A ( <b>1</b> )                                   | 15   | 28  | Figure S26. ROESY spectrum of schicagenin C ( <b>3</b> )                               | 32   |
| 12  | Figure S10. CD spectrum of schicagenin A ( <b>1</b> )                                  | 16   | 29  | Figure S27. HRESIMS spectrum of schicagenin C ( <b>3</b> )                             | 33   |
| 13  | Figure S11. <sup>1</sup> H NMR spectrum of schicagenin B ( <b>2</b> )                  | 17   | 30  | Figure S28. IR spectrum of schicagenin C ( <b>3</b> )                                  | 34   |
| 14  | Figure S12. <sup>13</sup> C NMR spectrum of schicagenin B ( <b>2</b> )                 | 18   | 31  | Figure S29. UV spectrum of schicagenin C ( <b>3</b> )                                  | 35   |
| 15  | Figure S13. HSQC spectrum of schicagenin B ( <b>2</b> )                                | 19   | 32  | Figure S30. CD spectrum of schicagenin C ( <b>3</b> )                                  | 36   |
| 16  | Figure S14. HMBC spectrum of schicagenin B ( <b>2</b> )                                | 20   | 33  | Figure S31. X-ray crystal structure of schicagenin A ( <b>1</b> )                      | 37   |
| 17  | Figure S15. <sup>1</sup> H– <sup>1</sup> H COSY spectrum of schicagenin B ( <b>2</b> ) | 21   |     |                                                                                        |      |

## Detailed experimental procedures

### 1. General Experimental procedures

Optical rotations were measured with a JASCO DIP-370 digital polarimeter. UV data were obtained on a Shimadzu UV-2401A spectrophotometer. CD spectra were measured on a Chirascan instrument. A BioRad FtS-135 spectrophotometer was used for scanning IR spectroscopy with KBr pellets. 1D and 2D NMR spectra were recorded on Bruker AM-400 and DRX-500 spectrometers. Unless otherwise specified, chemical shifts ( $\delta$ ) were expressed in ppm with reference to the solvent signals. High-resolution electrospray-ionization (HRESIMS) were performed on a VG Autospec-3000 spectrometer under 70 eV. X-ray diffraction was realized on a Bruker APEX DUO instrument. Column chromatography was performed with silica gel (200–300 mesh; Qingdao Marine Chemical, Inc., Qingdao, People's Republic of China), Lichroprep RP-18 gel (40–63  $\mu$ m, Merck, Darmstadt, Germany), or MCI gel (75–150  $\mu$ m, Mitsubishi Chemical Corporation, Tokyo, Japan). Semipreparative HPLC was performed on an Agilent 1200 liquid chromatograph with a Zorbax SB-C<sub>18</sub>, 9.4 mm  $\times$  25 cm column. Fractions were monitored by TLC and spots were visualized by heating silica gel plates sprayed with 10% H<sub>2</sub>SO<sub>4</sub> in EtOH. All solvents including petroleum ether (60–90 °C) were distilled prior to use.

### 2. Plant material

The leaves and stems of *Schisandra chinensis* were collected from Yabuli mountain area of Heilongjiang province, People's Republic of China, in August 2010. Voucher specimens (KIB 2010-08-13 ) were deposited at the State Key Laboratory of Phytochemistry and Plant Resources in West China, Kunming Institute of Botany, Chinese Academy of Sciences, and were identified by Prof. Xi-Wen Li.

### 3. Extraction and isolation

The air-dried and powdered leaves and stems (10 kg) were extracted with 70% aqueous Me<sub>2</sub>CO (3  $\times$  10 L, 3 days each) at room temperature, and concentrated under reduced pressure to give a crude extract, which was partitioned between H<sub>2</sub>O and EtOAc. The EtOAc part (438 g) was chromatographed on a silica gel column with a gradient elution of CHCl<sub>3</sub>/Me<sub>2</sub>CO (1:0 to 0:1) to furnish seven fractions A–G. Fraction E (41 g) was subject to further separation over columns, first MCI eluted with 90%

MeOH, then on RP-18 with a gradient elution of MeOH/H<sub>2</sub>O (3:7 to 1:0) to yield fractions E1–E6. Subsequently fraction E3 (2.26 g) was purified by a silica gel column (petroleum ether/Me<sub>2</sub>CO<sub>3</sub> 4:1 to 1:0) to give subfractions E3c (637mg) and E3d (700mg). Subfraction E3c was subjected to purified by semipreparative HPLC (3 mL/min, detector UV  $\lambda_{\max}$  275 nm, MeOH/MeCN/H<sub>2</sub>O 40:15:45) to yield **1** (11 mg). Subfraction E3d was purified by semipreparative HPLC (3 mL/min, detector UV  $\lambda_{\max}$  275 nm, MeCN/H<sub>2</sub>O 30:70) to yield **2** (6 mg) and **3** (3 mg).

Schicagenin A (**1**), colorless crystals;  $[\alpha]_{\text{D}}^{21.7} +349.3$  (*c* 0.11, MeOH); UV (MeOH)  $\lambda_{\max}$  (log  $\epsilon$ ): 275 (3.44) nm; CD (MeOH)  $\lambda_{\max}$  ( $\Delta\epsilon$ ): 307 (+15.95), 270 (−16.34); IR (KBr)  $\nu_{\max}$  3441, 2973, 2932, 1769, 1698, 1626, 1462, 1387, 1374, 1310, 1295, 1226, 1178, 1113, 1073, 1046, 1020, 989, 937, 915, 843, 758 cm<sup>−1</sup>; positive ESIMS  $[M + Na]^+$   $m/z$  567; positive HRESIMS  $[M + Na]^+$   $m/z$  567.2204 (calcd. C<sub>29</sub>H<sub>36</sub>O<sub>10</sub>Na  $[M + Na]^+$ , 567.2206).

Schicagenin B (**2**), white solid;  $[\alpha]_{\text{D}}^{21.7} +276.0$  (*c* 0.18, MeOH); UV (MeOH)  $\lambda_{\max}$  (log  $\epsilon$ ): 275 (3.54) nm; CD (MeOH)  $\lambda_{\max}$  ( $\Delta\epsilon$ ): 300 (+15.95), 270 (−16.59); IR (KBr)  $\nu_{\max}$  3440, 2973, 2932, 1767, 1697, 1627, 1460, 1383, 1296, 1237, 1221, 1174, 1118, 1072, 1043, 1016, 991, 935, 914, 843, 758 cm<sup>−1</sup>; positive ESIMS  $[M + Na]^+$   $m/z$  583; positive HRESIMS  $[M + Na]^+$   $m/z$  583.2151 (calcd. C<sub>29</sub>H<sub>36</sub>O<sub>11</sub>Na  $[M + Na]^+$ , 583.2155).

Schicagenin C (**3**), white solid;  $[\alpha]_{\text{D}}^{21.7} -28.2$  (*c* 0.16, MeOH); UV (MeOH)  $\lambda_{\max}$  (log  $\epsilon$ ): 276 (3.31) nm; CD (MeOH)  $\lambda_{\max}$  ( $\Delta\epsilon$ ): 300 (−14.72), 270 (+4.29); IR (KBr)  $\nu_{\max}$  3440, 2968, 2931, 1766, 1701, 1626, 1461, 1382, 1296, 1252, 1237, 1221, 1174, 1117, 1073, 1018, 992, 935, 914, 842, 759 cm<sup>−1</sup>; positive ESIMS  $[M + Na]^+$   $m/z$  583; positive HRESIMS  $[M + Na]^+$   $m/z$  583.2150 (calcd. C<sub>29</sub>H<sub>36</sub>O<sub>11</sub>Na  $[M + Na]^+$ , 583.2155).

X-ray Crystallographic Analysis of schicagenin A (**1**): C<sub>29</sub>H<sub>44</sub>O<sub>14</sub>,  $M + 4H_2O = 616.64$ , colorless prism, size 0.18 × 0.18 × 0.60 mm<sup>3</sup>, orthorhombic, space group P2<sub>1</sub>2<sub>1</sub>2<sub>1</sub>;  $a = 11.1986(2)$  Å,  $b = 12.0920(2)$  Å,  $c = 23.6000(4)$  Å,  $\alpha = \beta = \gamma = 90.00^\circ$ ;  $V = 3195.76(9)$  Å<sup>3</sup>,  $T = 296(2)$  K,  $Z = 4$ ,  $\rho_{\text{calcd.}} = 1.282$  g/cm<sup>3</sup>,  $\mu(\text{Cu K}\alpha) = 0.863$  mm<sup>−1</sup>,  $F(000) = 1320$ , 22863 reflections in  $h(-10/12)$ ,  $k(-14/13)$ ,  $l(-27/28)$ , measured in the range  $3.75^\circ \leq \theta \leq 68.04^\circ$ , completeness  $\theta_{\max} = 94.6\%$ , 5453 independent reflections,  $R_{\text{int}} = 0.0307$ , 5277 reflections with  $|F|^2 \geq 2\sigma|F|^2$ , 396 parameters, 0 restraints, GOF =

1.061. Final  $R$  indices:  $R_1 = 0.0527$ ,  $wR_2 = 0.1590$ .  $R$  indices (all data):  $R_1 = 0.0538$ ,  $wR_2 = 0.1608$ . Flack parameter  $-0.1(2)$ , largest difference peak and hole =  $0.538$  and  $-0.232$  e  $\text{\AA}^{-3}$ . The intensity data for **1** were collected on a Bruker APEX DUO diffractometer using graphite-monochromated Cu  $K\alpha$  radiation. The structure of **1** was solved by direct methods (SHELXS97), expanded using difference Fourier techniques, and refined by the program and full-matrix least-squares calculations. The nonhydrogen atoms were refined anisotropically, and hydrogen atoms were fixed at calculated positions. Crystallographic data for the structure of **1** have been deposited in the Cambridge Crystallographic Data Centre (deposition number CCDC 825583). Copies of the data can be obtained free of charge from the CCDC via [www.ccdc.cam.ac.uk](http://www.ccdc.cam.ac.uk).

#### **4. Cellular Proliferation Assay**

Colorimetric assays were performed to evaluate compound activity. The following human tumor cell lines were used: the HL-60 human myeloid leukemia cell line, the SMMC-7721 human hepatocarcinoma cell line, the A549 lung cancer cell line, the MCF-7 breast cancer cell line, and the SW-480 human pancreatic carcinoma. All cells were cultured in RPMI-1640 or DMEM medium (Hyclone, Logan, UT), supplemented with 10% fetal bovine serum (Hyclone) at  $37\text{ }^{\circ}\text{C}$  in a humidified atmosphere with 5%  $\text{CO}_2$ . Cell viability was assessed by conducting colorimetric measurements of the amount of insoluble formazan formed in living cells based on the reduction of 3-(4,5-dimethylthiazol-2-yl)-2,5-diphenyltetrazolium bromide (MTT) (Sigma, St. Louis, MO). Briefly,  $100\text{ }\mu\text{L}$  adherent cells were seeded into each well of a 96-well cell culture plate and allowed to adhere for 12 h before drug addition, while suspended cells were seeded just before drug addition, both with initial density of  $1 \times 10^5$  cells/mL in  $100\text{ }\mu\text{L}$  of medium. Each tumor cell line was exposed to the test compound at various concentrations in triplicate for 48 h, with *cis*-Platin (Sigma) as positive control. After the incubation, MTT ( $100\text{ }\mu\text{g}$ ) was added to each well, and the incubation continued for 4 h at  $37\text{ }^{\circ}\text{C}$ . The cells were lysed with  $100\text{ }\mu\text{L}$  of 20% SDS-50% DMF after removal of  $100\text{ }\mu\text{L}$  of medium. The optical density of the lysate was measured at 595 nm in a 96-well microtiter plate reader (Bio-Rad 680). The  $\text{IC}_{50}$  value of each compound was calculated by Reed and Muench's method.

**Table S1.** <sup>1</sup>H NMR assignments of (**1–3**) (pyridine-*d*<sub>5</sub>,  $\delta$  in ppm)<sup>a</sup>

| position    | <b>1</b>                                    | <b>2</b>                                    | <b>3</b>                                    |
|-------------|---------------------------------------------|---------------------------------------------|---------------------------------------------|
|             | $\delta_{\text{H}}$ (mult., <i>J</i> in Hz) | $\delta_{\text{H}}$ (mult., <i>J</i> in Hz) | $\delta_{\text{H}}$ (mult., <i>J</i> in Hz) |
| 1           | 4.19 (d, 5.5)                               | 4.29 (d, 5.5)                               | 4.32 (d, 5.6)                               |
| 2 $\alpha$  | 2.59 (d, 18.1)                              | 2.53 (d, 18.0)                              | 2.56 (d, 18.1)                              |
| 2 $\beta$   | 2.82 (overlap)                              | 2.81 (overlap)                              | 2.93 (dd, 18.1, 5.7)                        |
| 5           | 2.46 (s)                                    | 3.21 (s)                                    | 3.21 (s)                                    |
| 6           | 4.48 (d, 8.4)                               | 4.76 (d, 8.6)                               | 4.72 (d, 8.5)                               |
| 7 $\alpha$  | 2.66 (m)                                    | 2.68 (m)                                    | 2.65 (m)                                    |
| 7 $\beta$   | 2.20 (overlap)                              | 2.30 (overlap)                              | 2.29(overlap)                               |
| 8           | 2.81 (overlap)                              | 2.83 (overlap)                              | 2.80 (d, 5.8)                               |
| 11 $\alpha$ | 2.19 (overlap)                              | 2.23 (overlap)                              | 2.24 (overlap)                              |
| 11 $\beta$  | 1.39 (m)                                    | 1.40 (m)                                    | 1.36 (m)                                    |
| 12 $\alpha$ | 2.23 (overlap)                              | 2.28 (overlap)                              | 2.26 (overlap)                              |
| 12 $\beta$  | 1.54 (m)                                    | 1.56 (m)                                    | 1.55 (m)                                    |
| 16 $\alpha$ | 3.36 (d, 16.0)                              | 3.33 (d, 15.8)                              | 2.99 (d, 16.0)                              |
| 16 $\beta$  | 3.12 (d, 16.0)                              | 3.10 (d, 15.8)                              | 3.08 (d, 16.0)                              |
| 18          | 1.08(s)                                     | 1.07 (s)                                    | 1.09 (s)                                    |
| 19 $\alpha$ | 1.97 (d, 16.0)                              | 2.01 (d, 16.0)                              | 2.03 (d, 15.8)                              |
| 19 $\beta$  | 2.22 (overlap)                              | 2.30 (overlap)                              | 2.32 (overlap)                              |
| 20          | 5.43 (m)                                    | 5.39 (m)                                    | 4.97 (m)                                    |
| 21          | 1.81 (d, 4.8)                               | 1.78 (d, 6.3)                               | 1.51 (d, 7)                                 |
| 22          | 5.28 (d, 10.8)                              | 5.26 (d, 10.8)                              | 5.94 (d, 6.7)                               |
| 24          | 7.01 (s)                                    | 6.99 (s)                                    | 7.72 (s)                                    |
| 27          | 1.82 (s)                                    | 1.81 (s)                                    | 1.72 (s)                                    |
| 29          | 1.10 (s)                                    | 3.73 (d, 11.7)                              | 3.72 (d, 11.5)                              |
|             |                                             | 3.59 (d, 11.7)                              | 3.57 (d, 11.7)                              |
| 30          | 1.07 (s)                                    | 1.24 (s)                                    | 1.23 (s)                                    |

<sup>a</sup> Data for compounds **1–3** was recorded at 500 MHz, and the assignments were base on DEPT, HSQC, HMBC, COSY, and ROESY experiments.

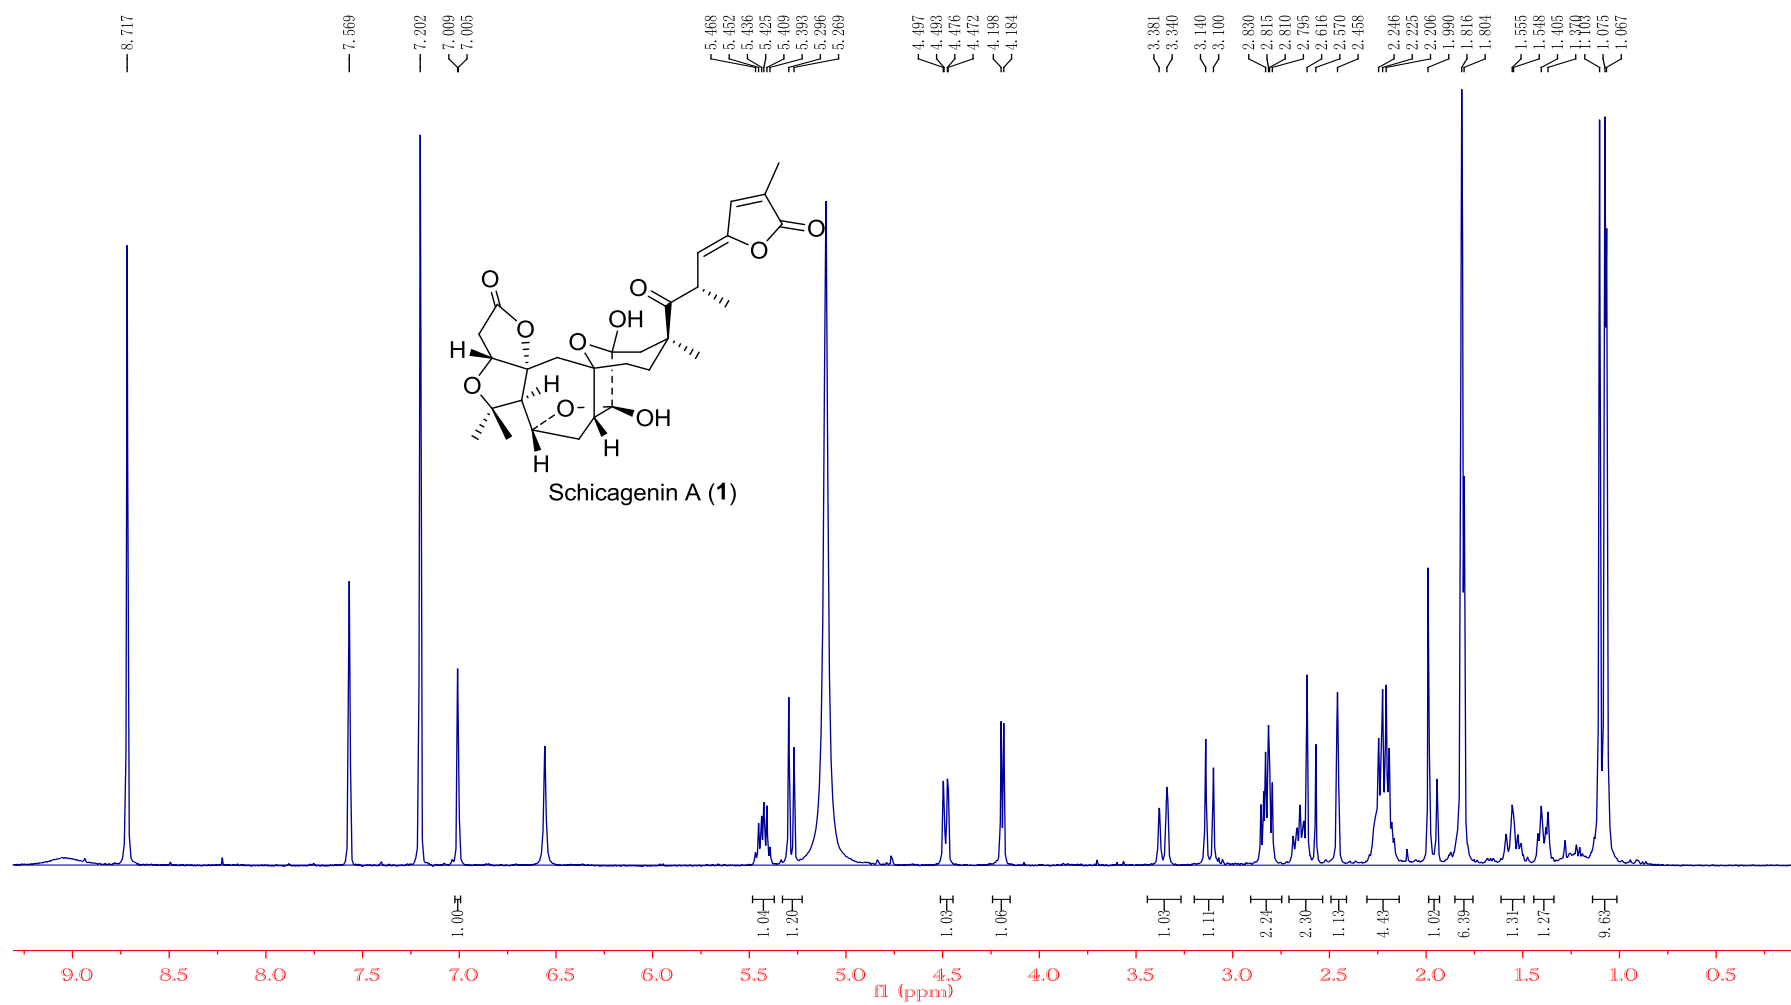

Figure S1.  $^1\text{H}$  NMR spectrum of schicagenin A (1)

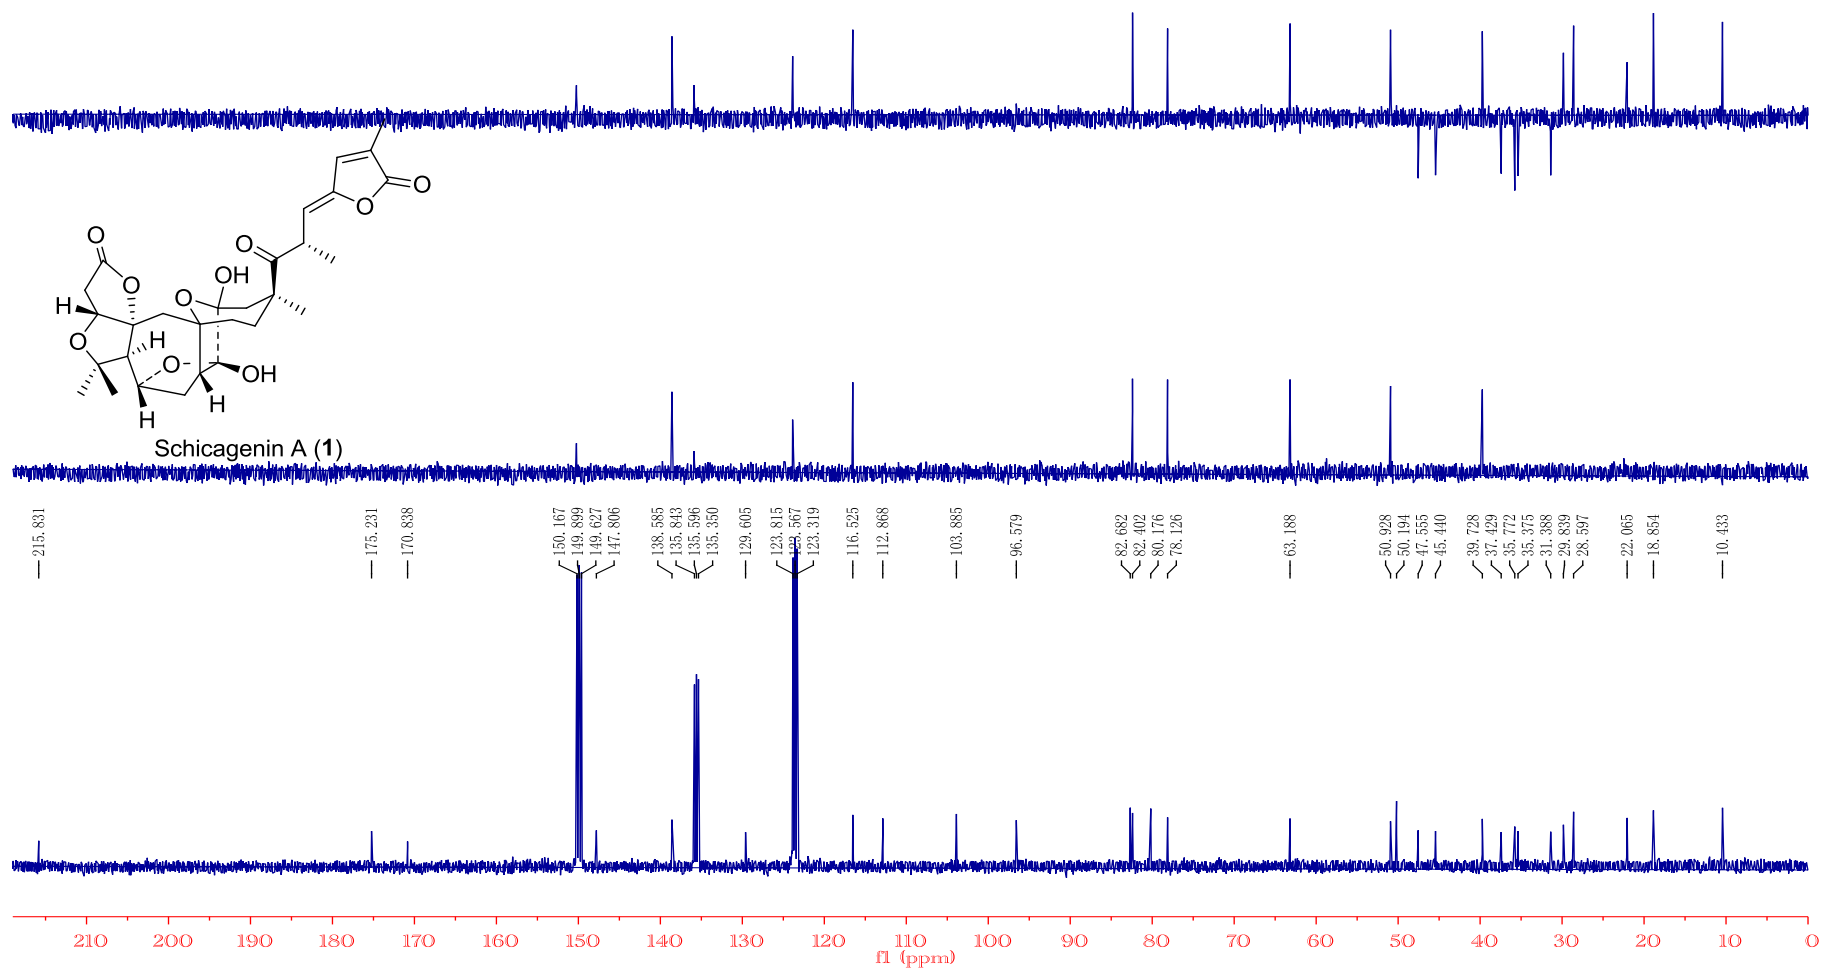

Figure S2.  $^{13}\text{C}$  NMR spectrum of schicagenin A (1)



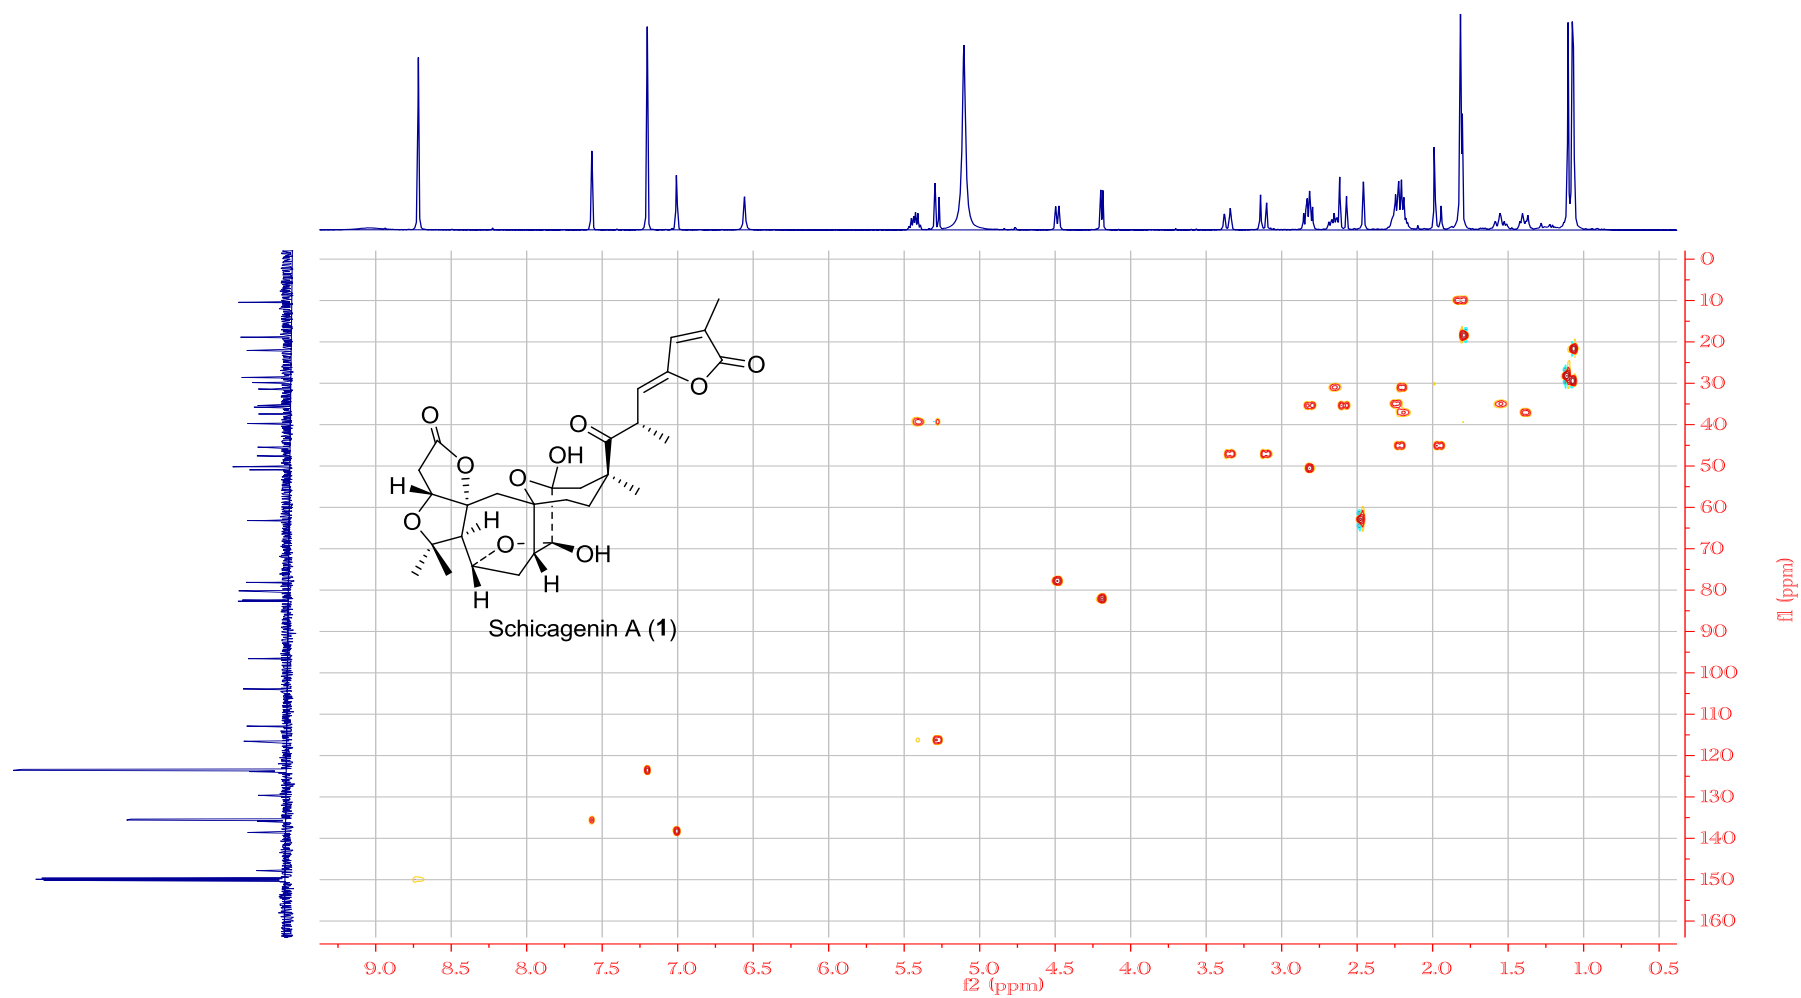

Figure S3. HSQC spectrum of schicagenin A (1)

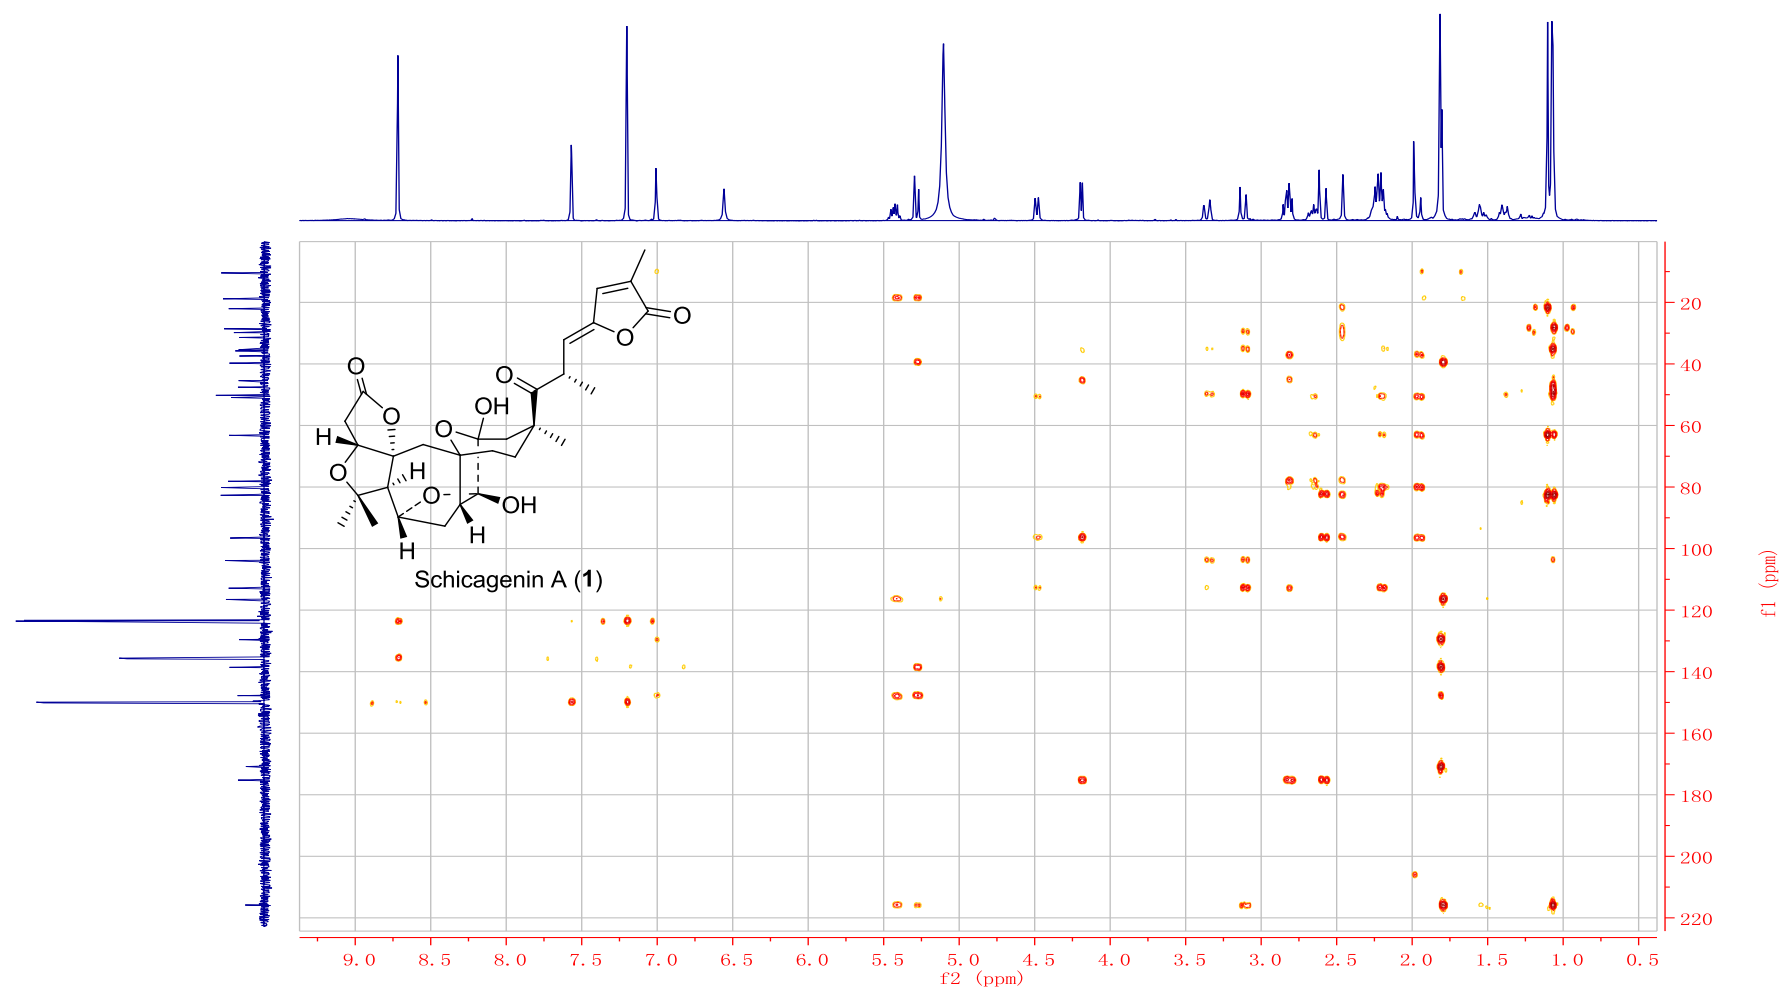

Figure S4. HMBC spectrum of schicagenin A (1)

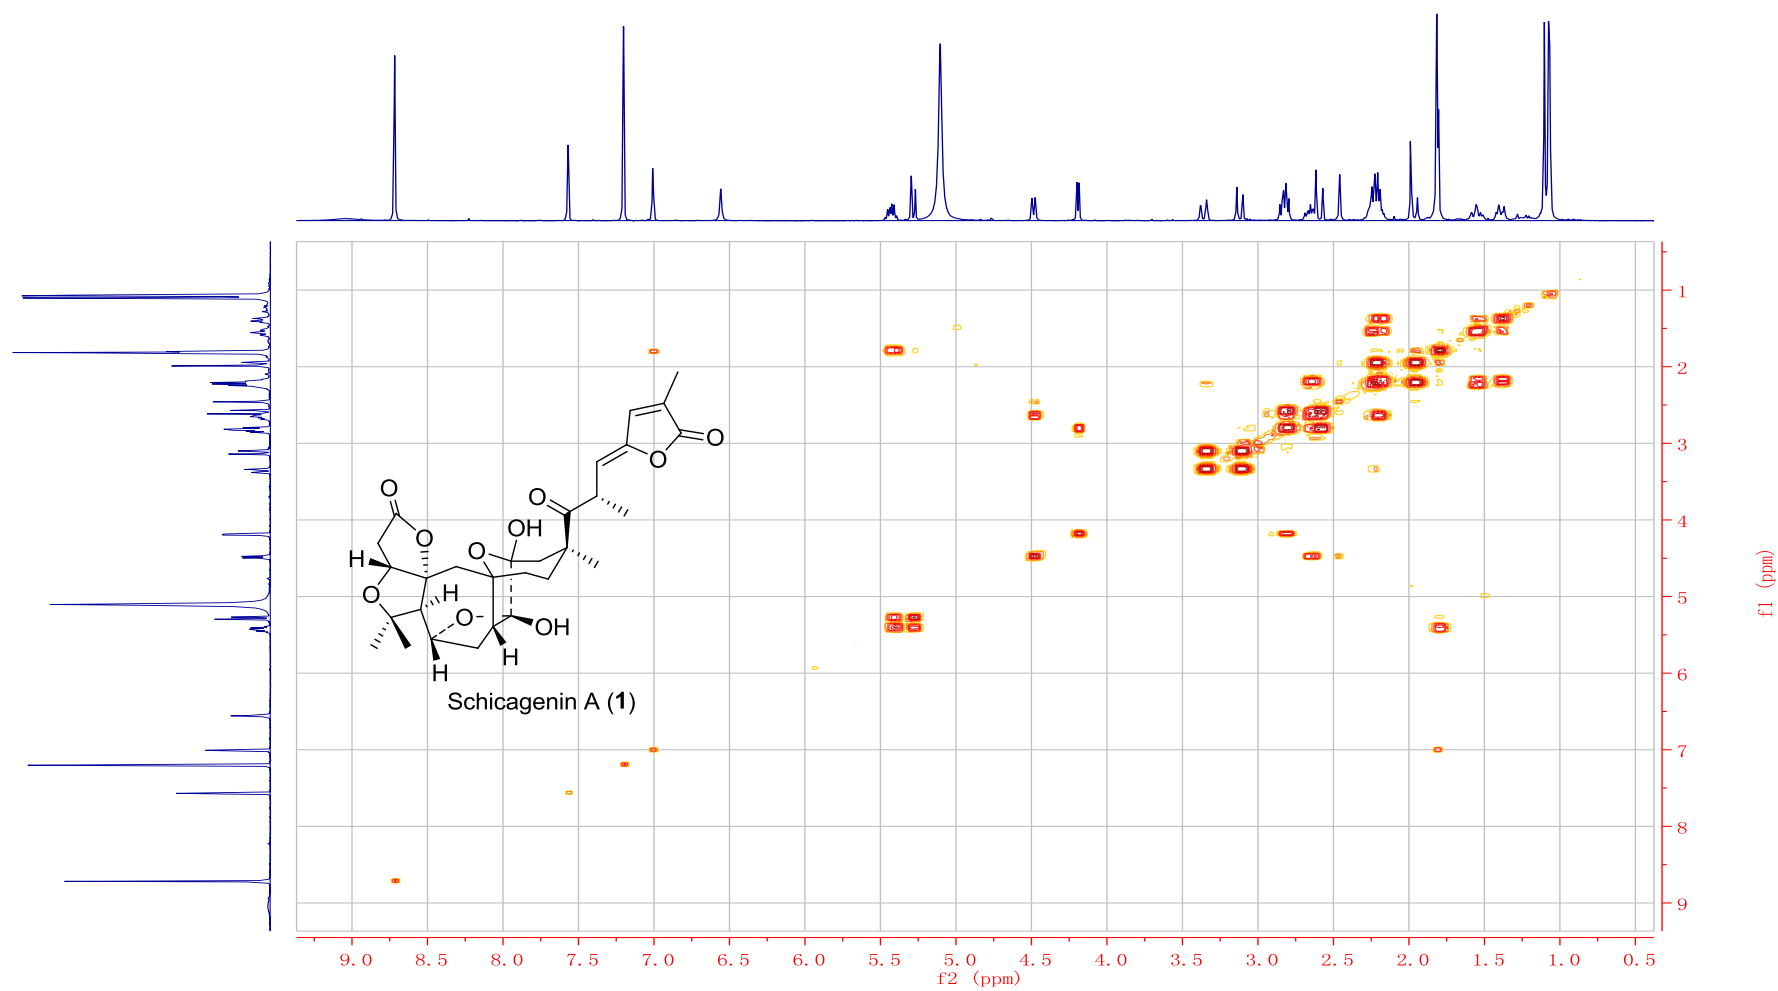

Figure S5.  $^1\text{H}$ - $^1\text{H}$  COSY spectrum of schicagenin A (1)



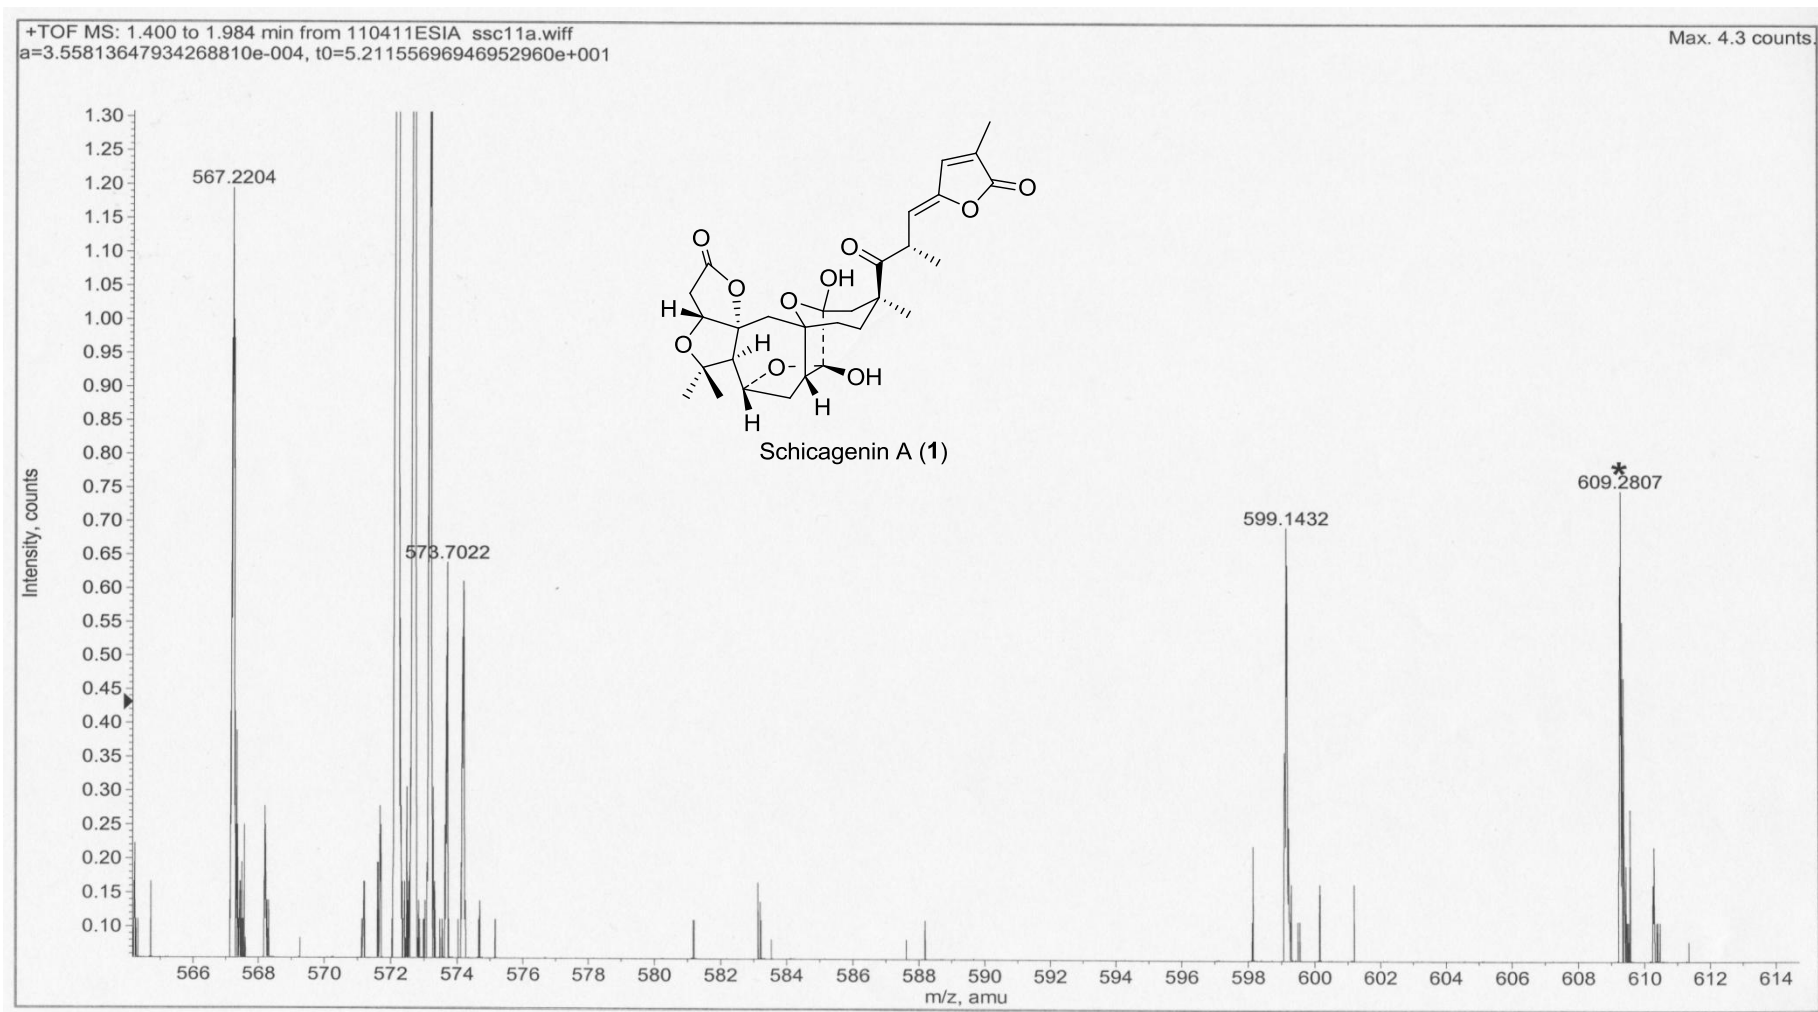

Figure S7. HRESIMS spectrum of schicagenin A (1)

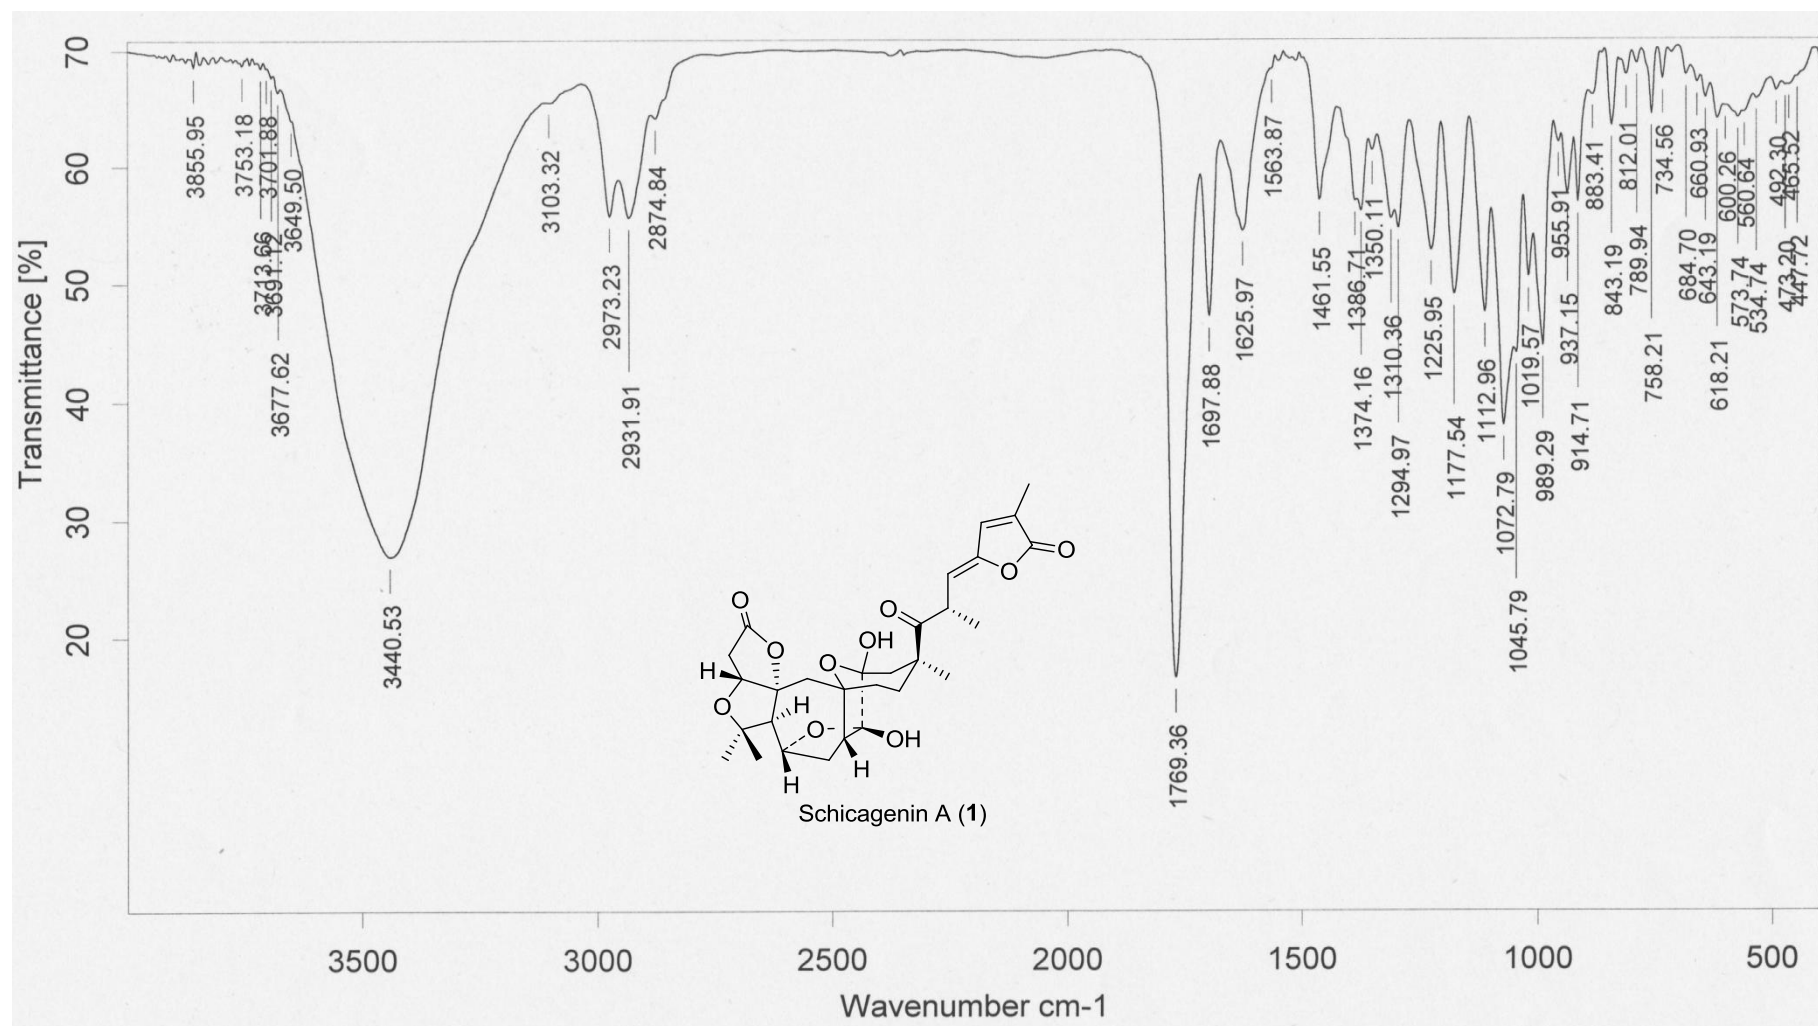

Figure S8. IR spectrum of schicagenin A (1)

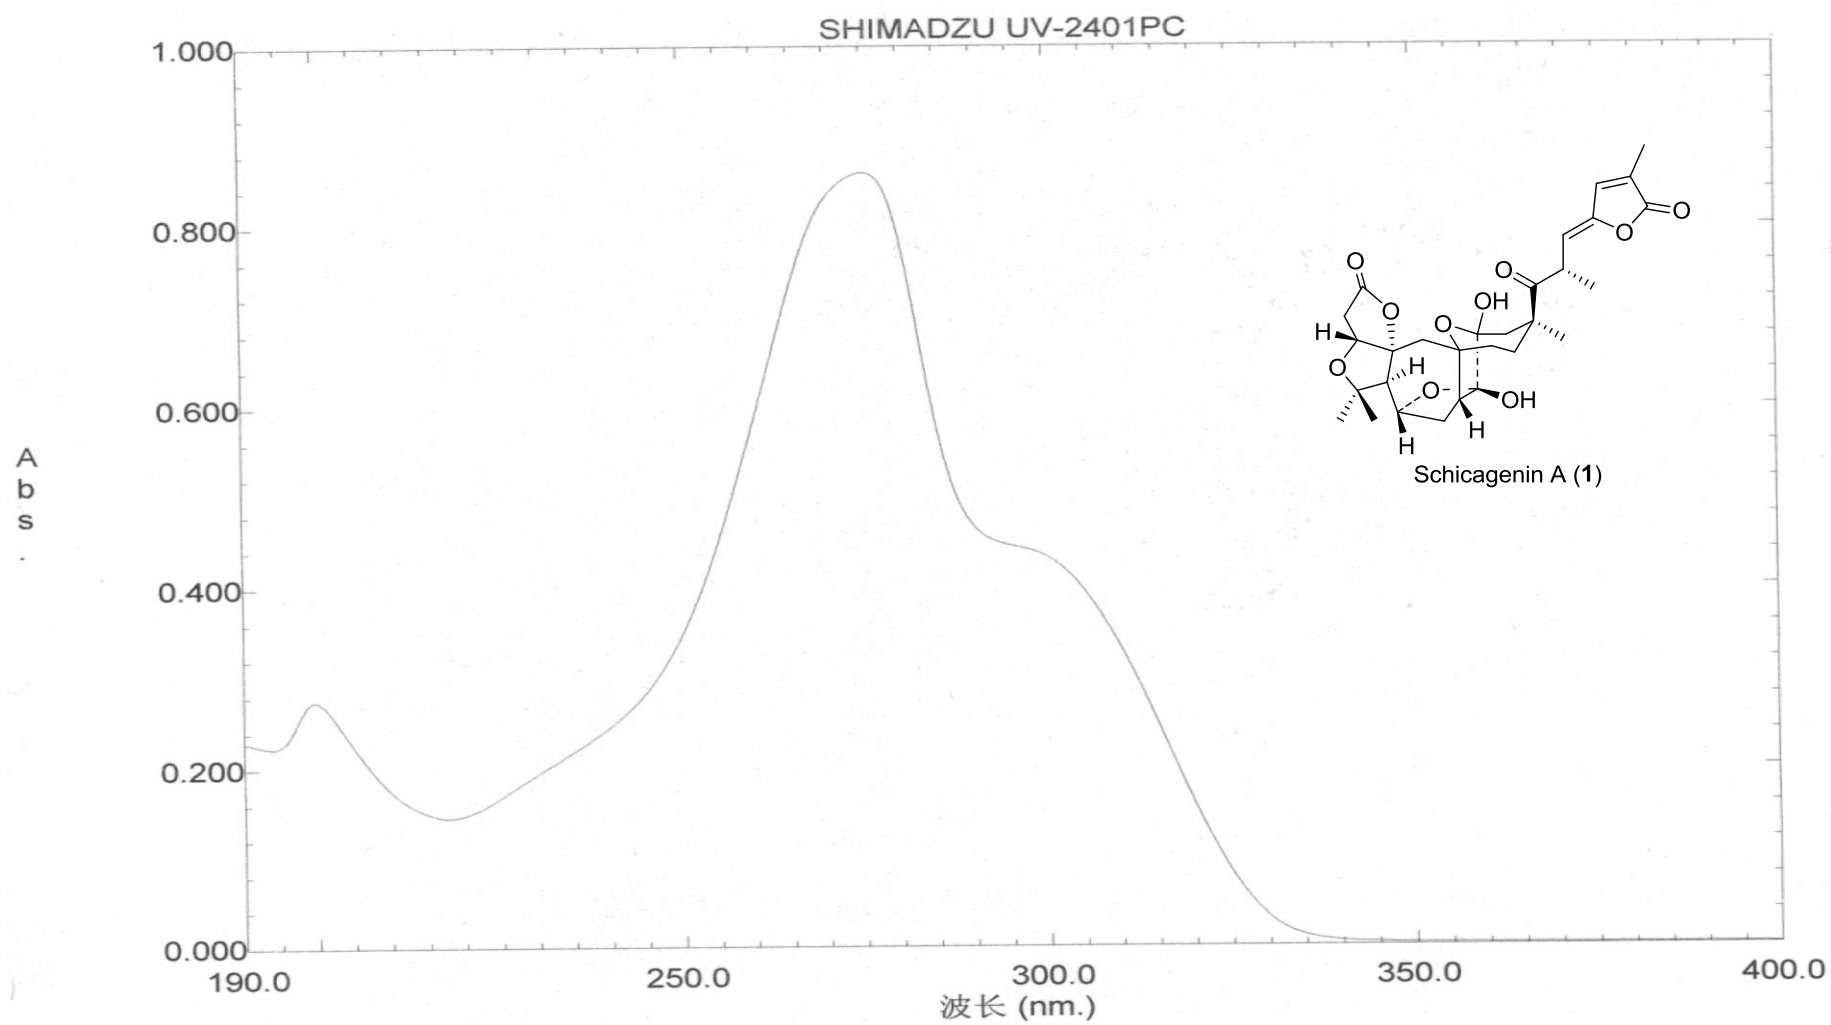

Figure S9. UV spectrum of schicagenin A (1)

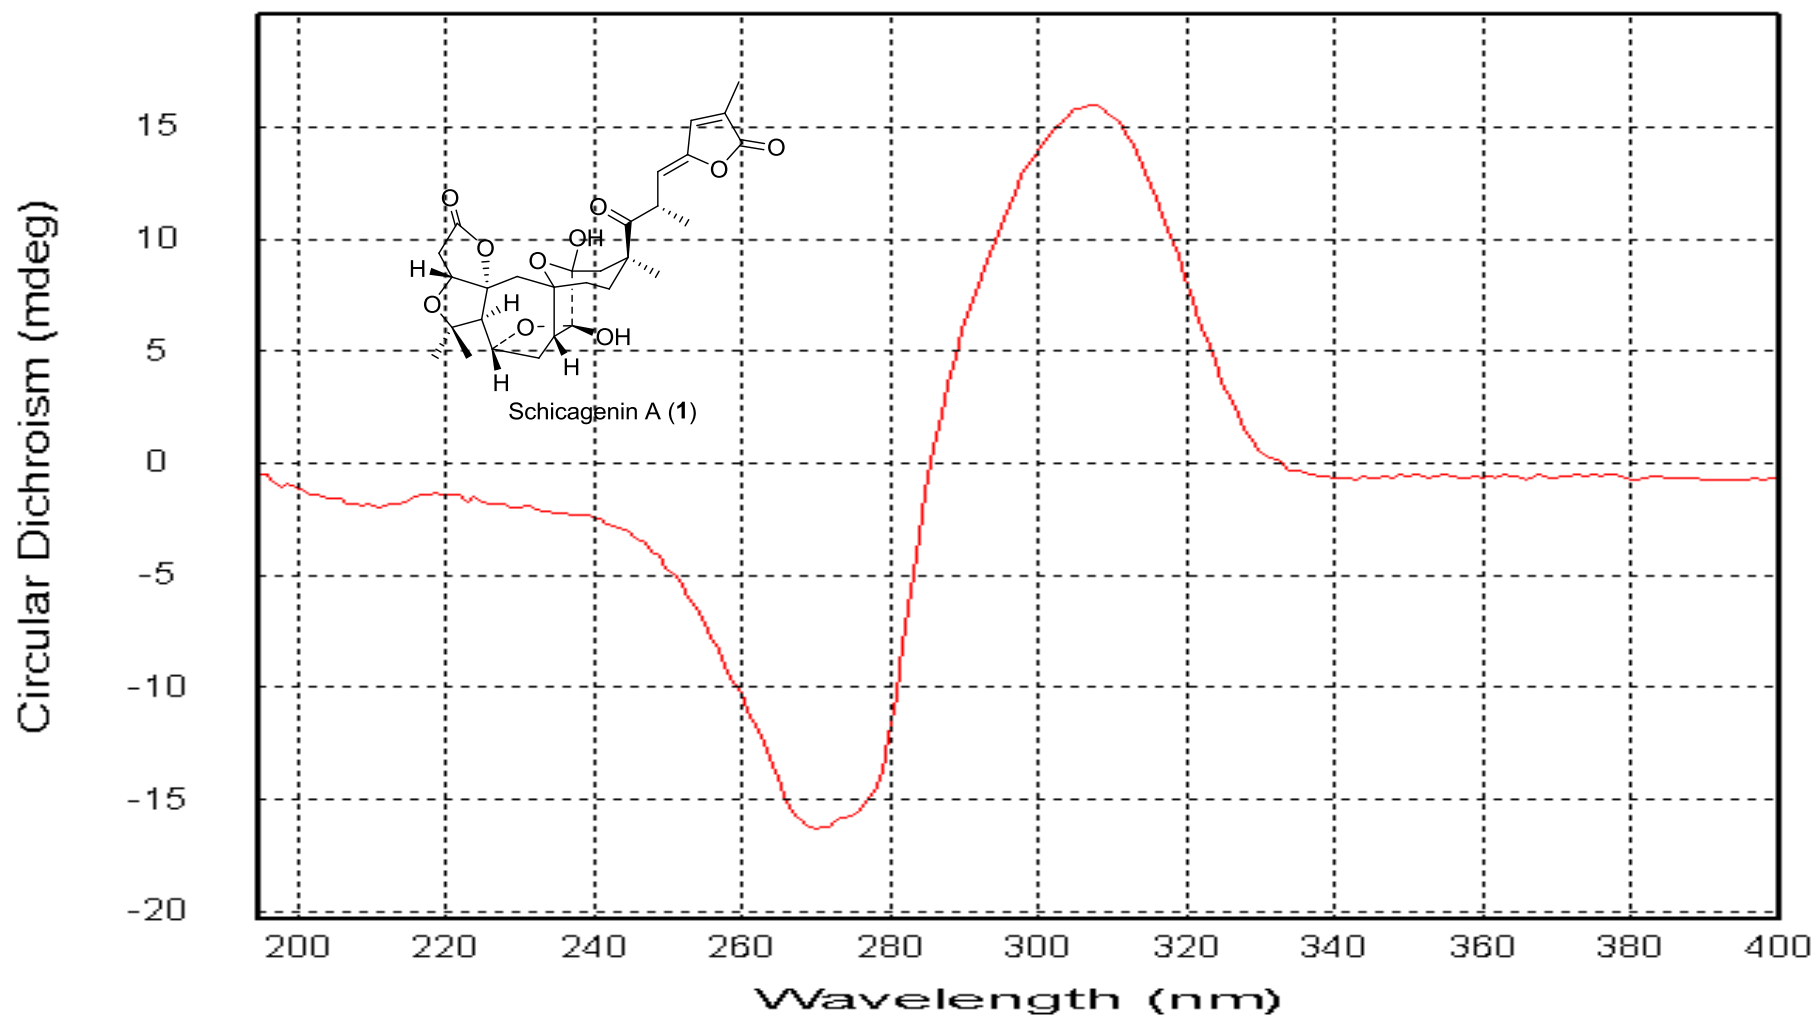

Figure S10. CD spectrum of schicagenin A (1)



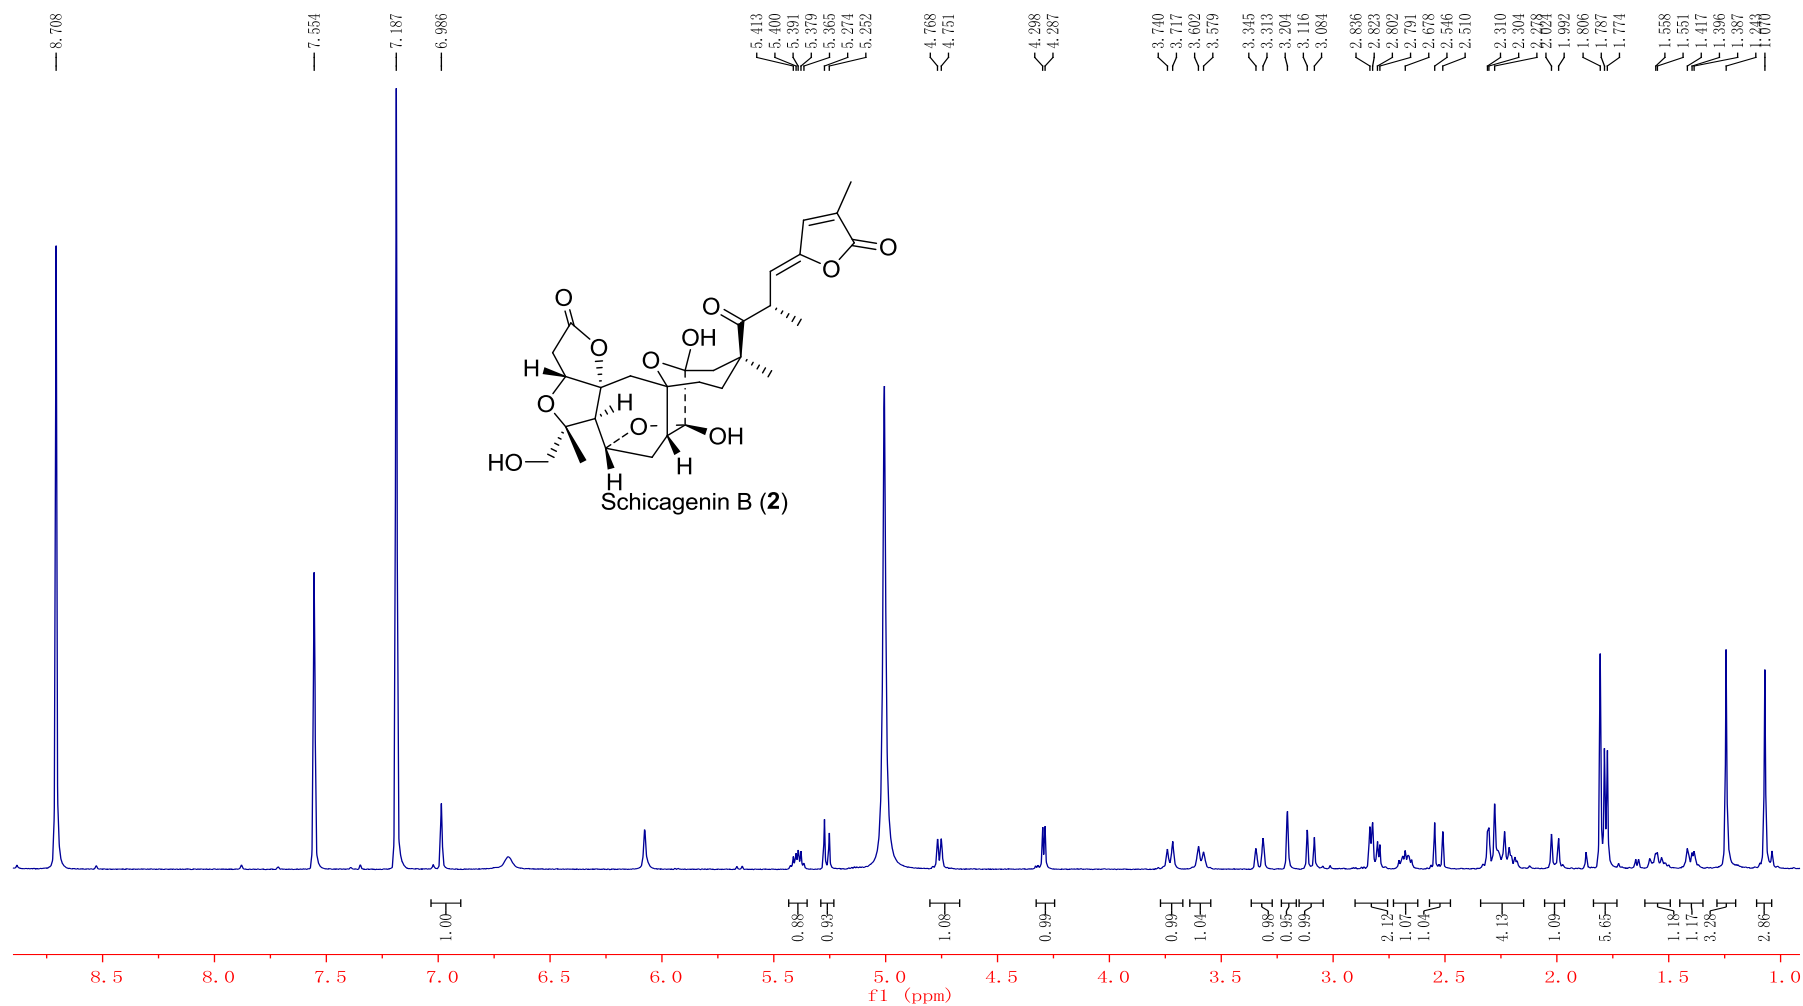

Figure S11.  $^1\text{H}$  NMR spectrum of schicagenin B (2)

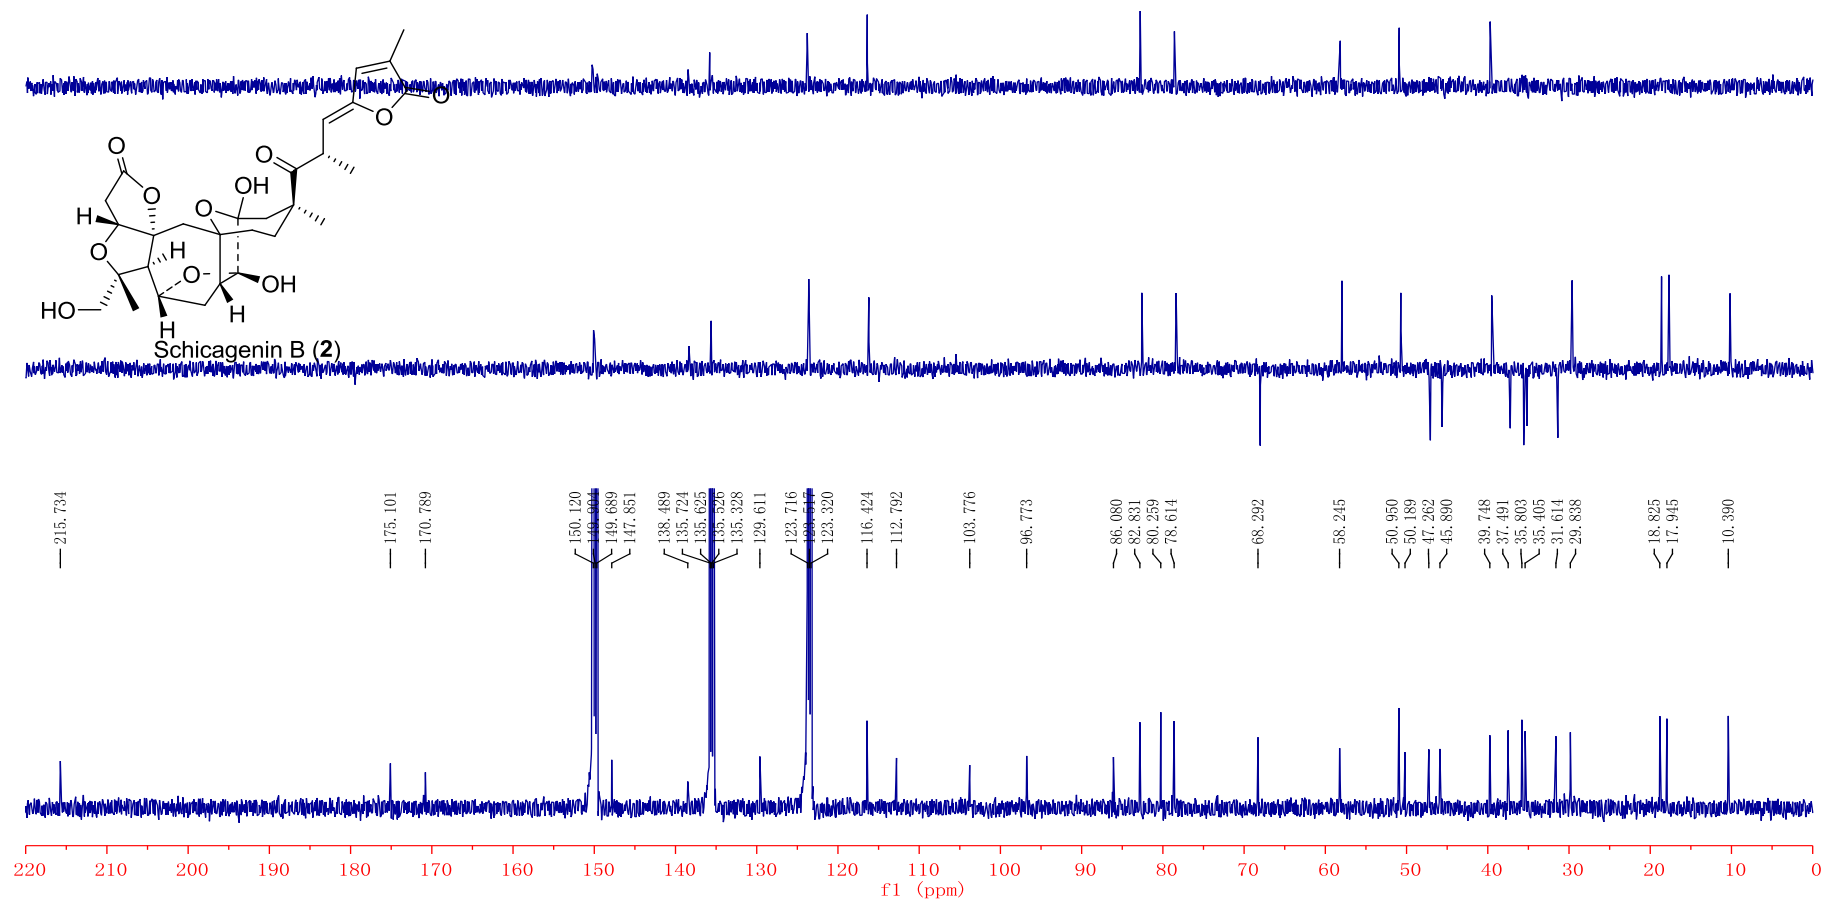

Figure S12.  $^{13}\text{C}$  NMR spectrum of schicagenin B (2)

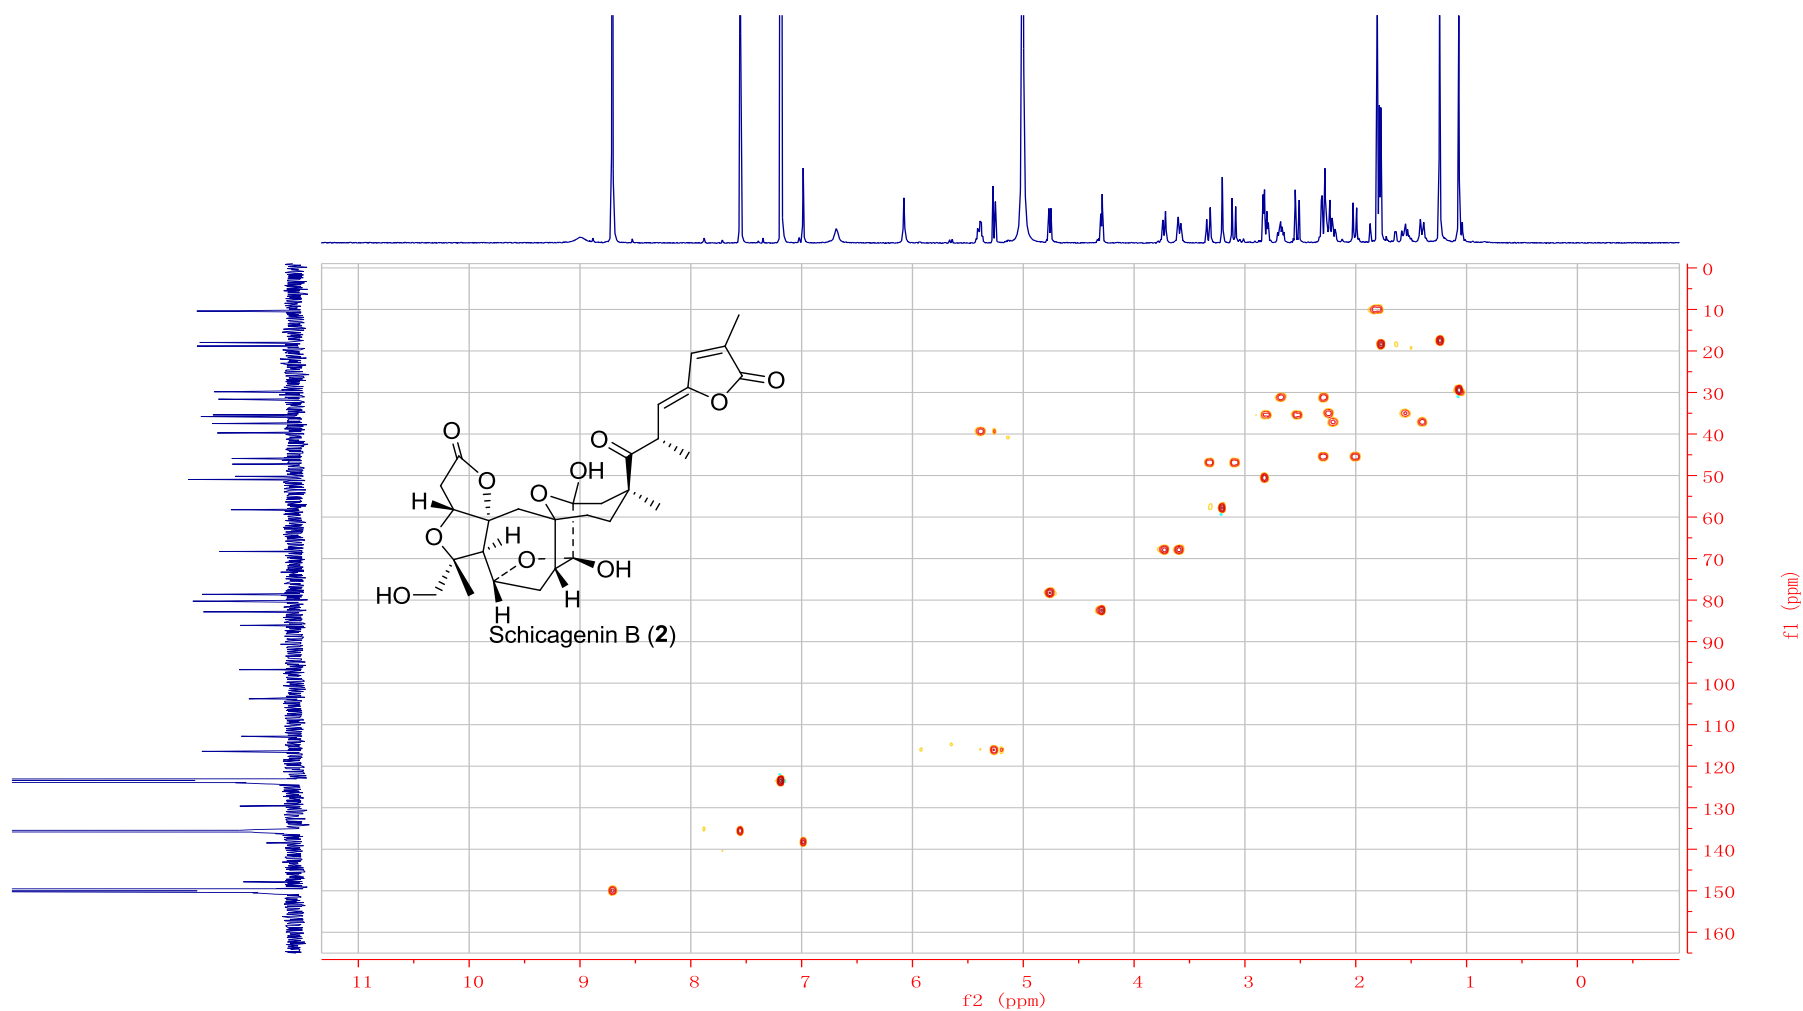

Figure S13. HSQC spectrum of schicagenin B (2)

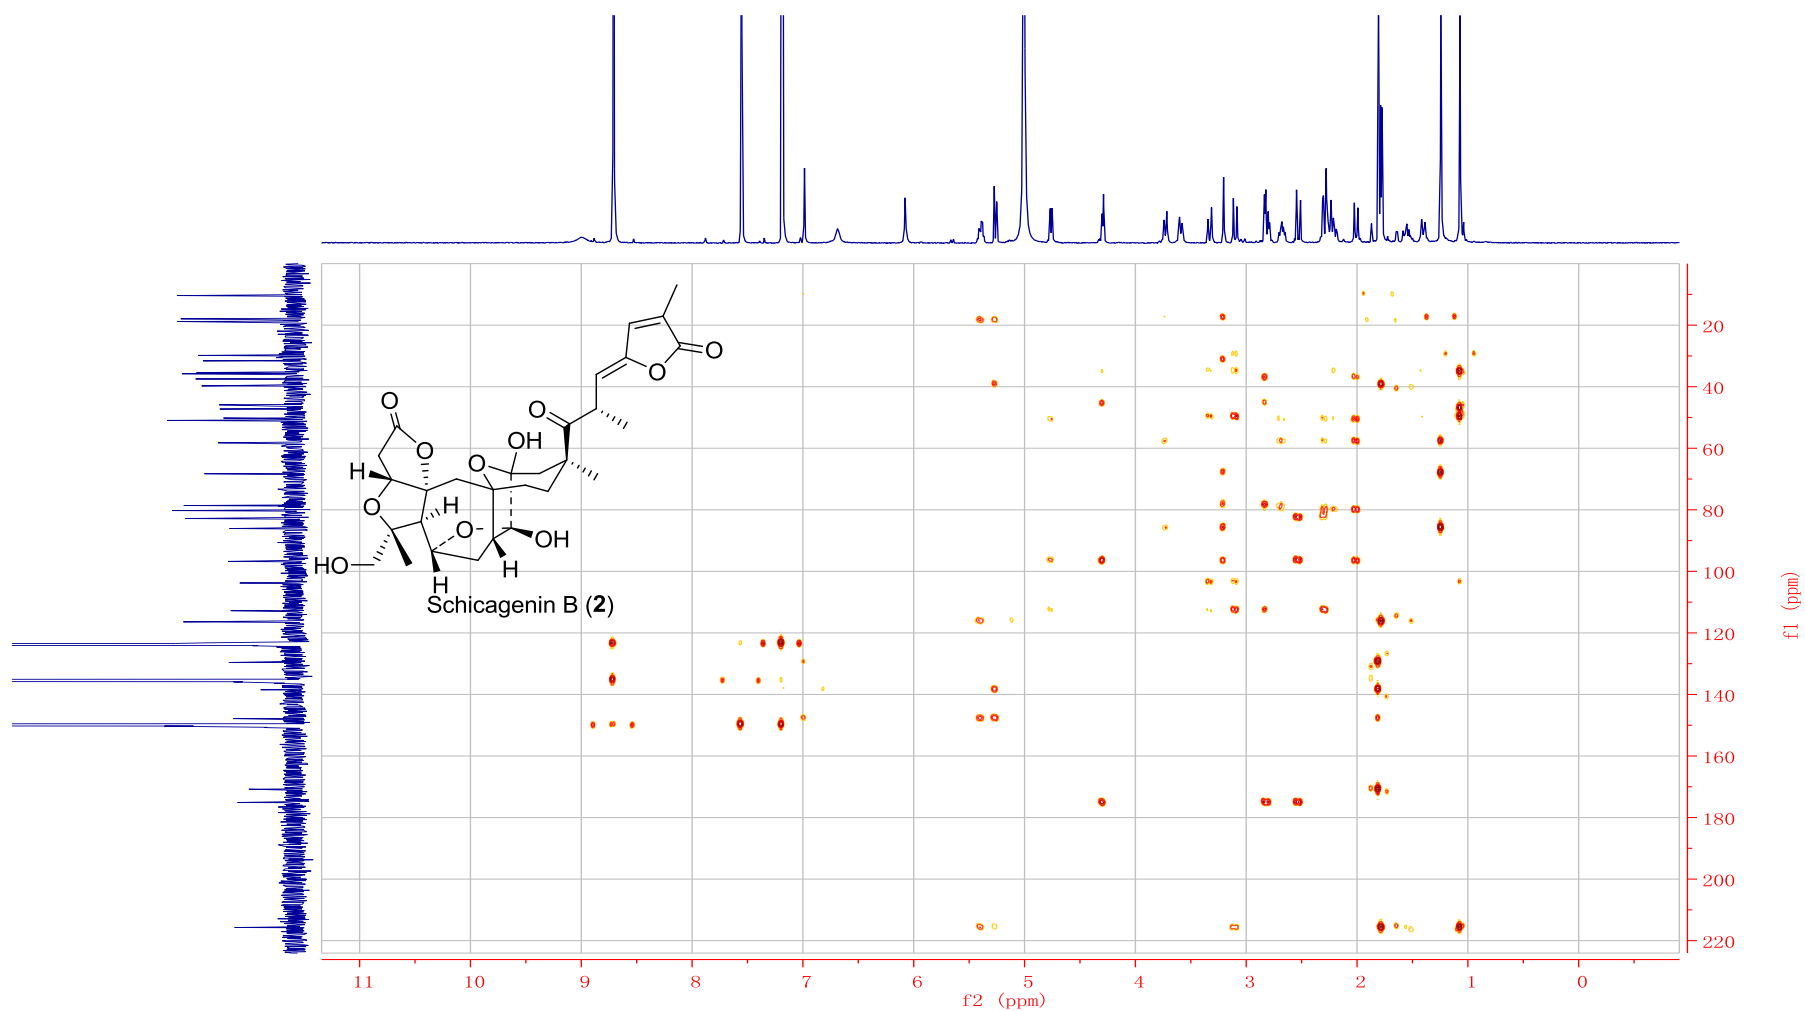

Figure S14. HMBC spectrum of schicagenin B (2)

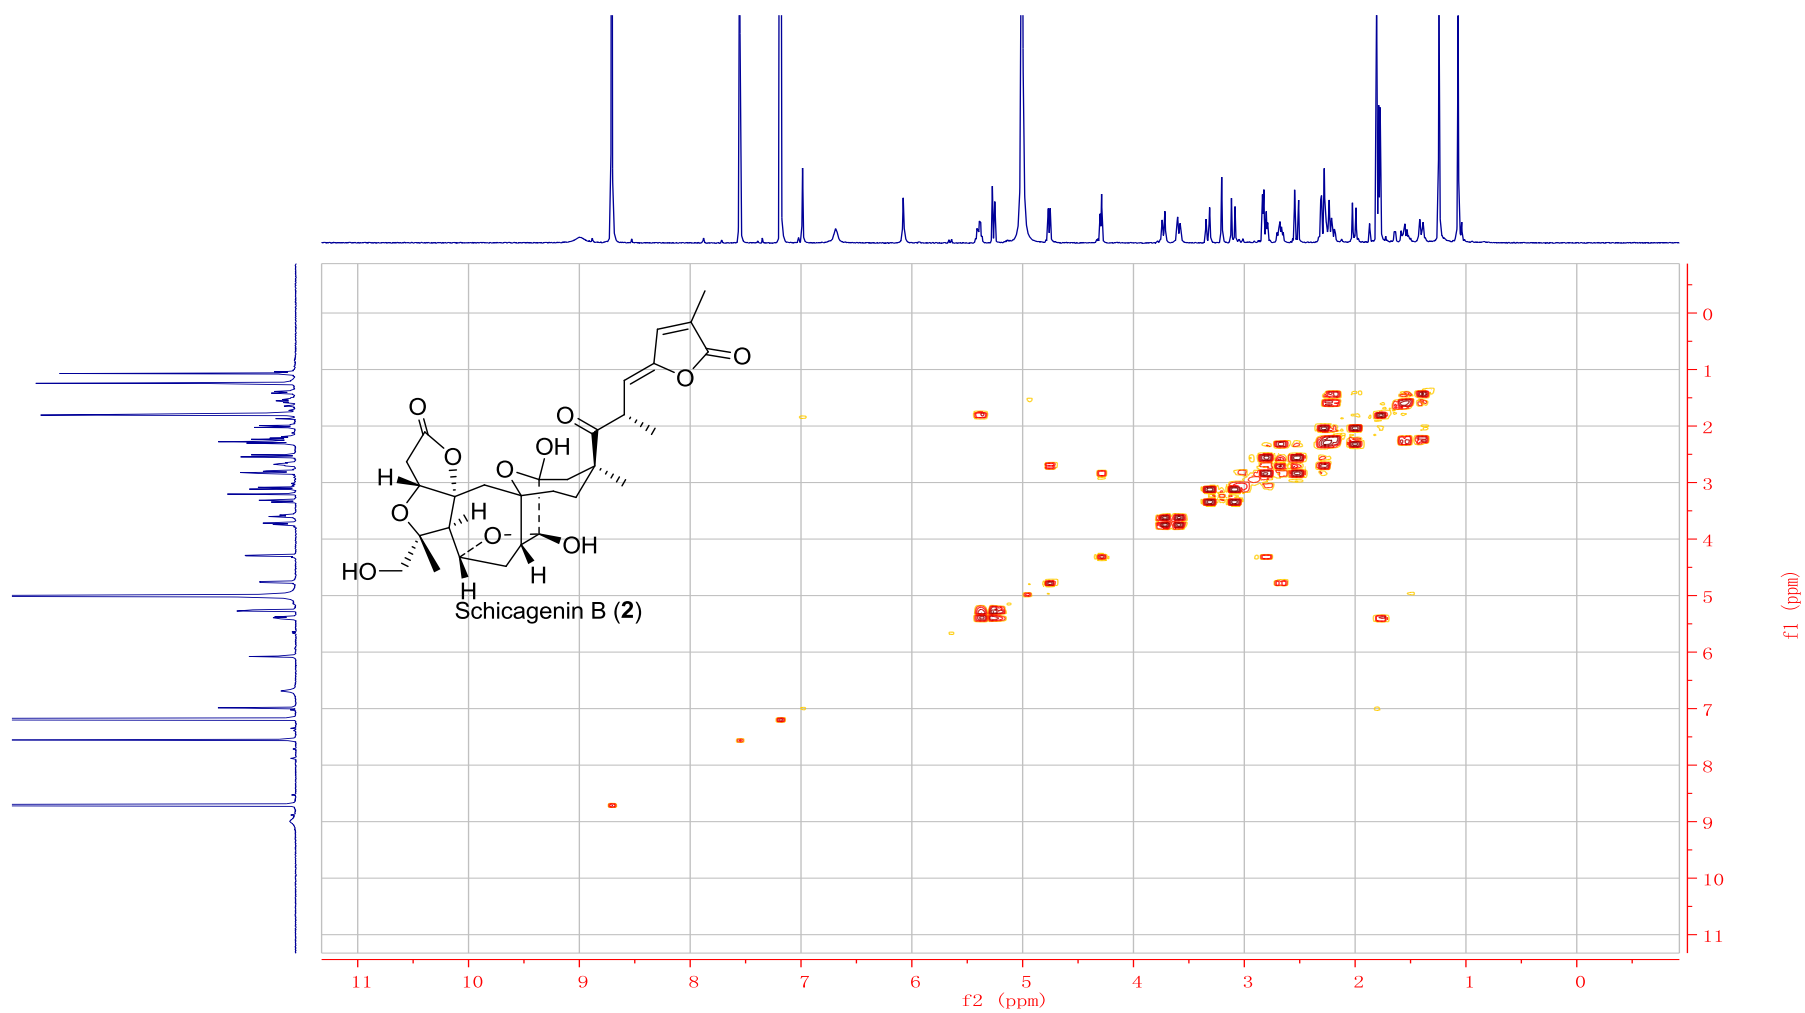

Figure S15.  $^1\text{H}$ - $^1\text{H}$  COSY spectrum of schicagenin B (2)

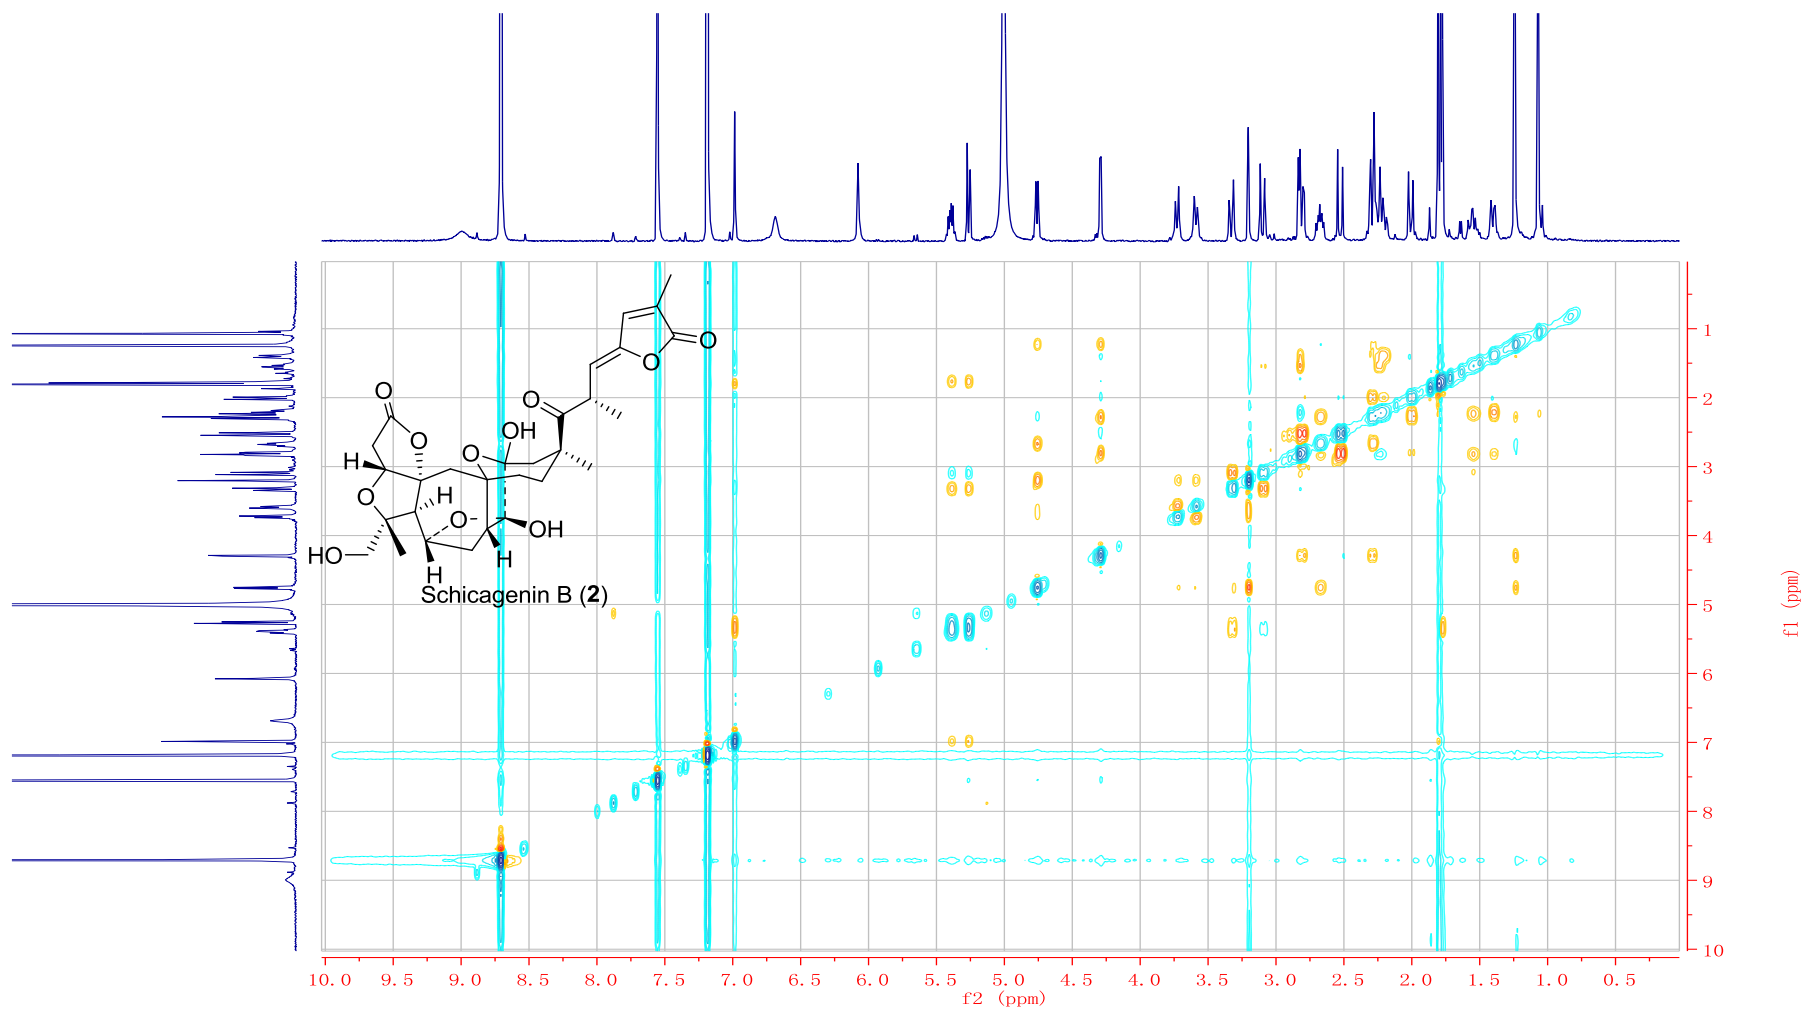

Figure S16. ROESY spectrum of schicagenin B (2)

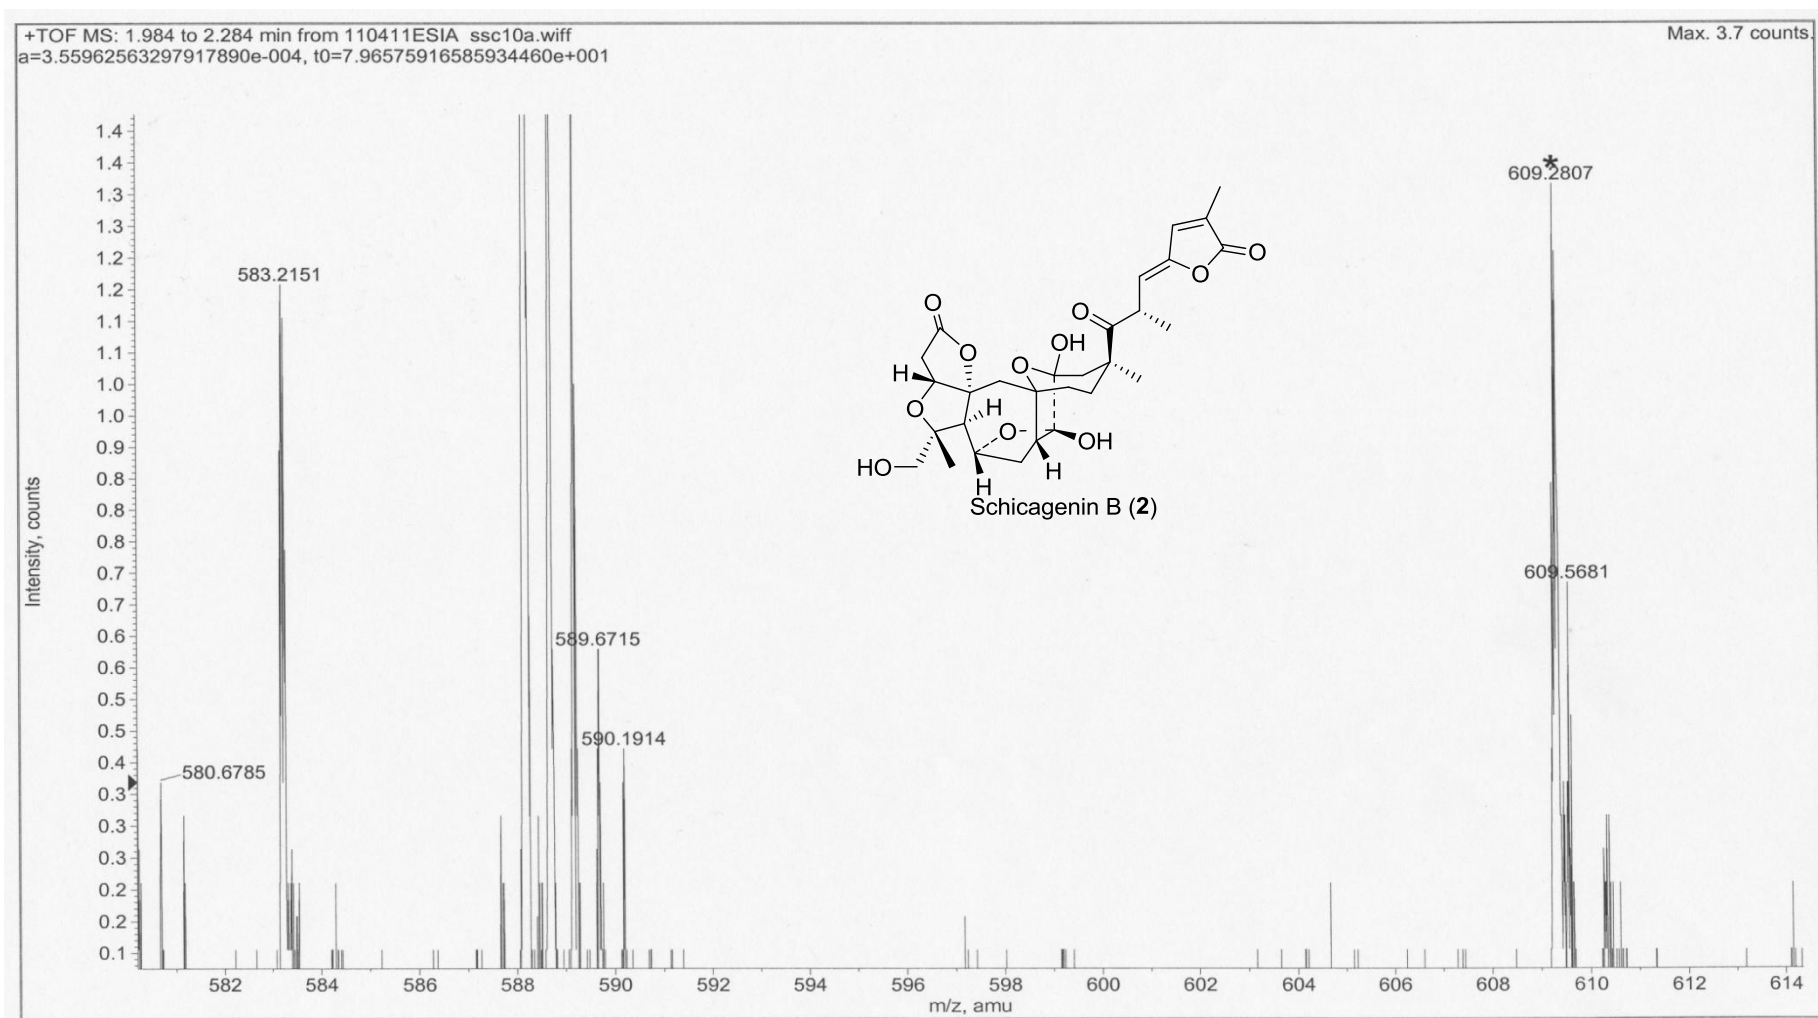

Figure S17. HRESIMS spectrum of schicagenin B (2)

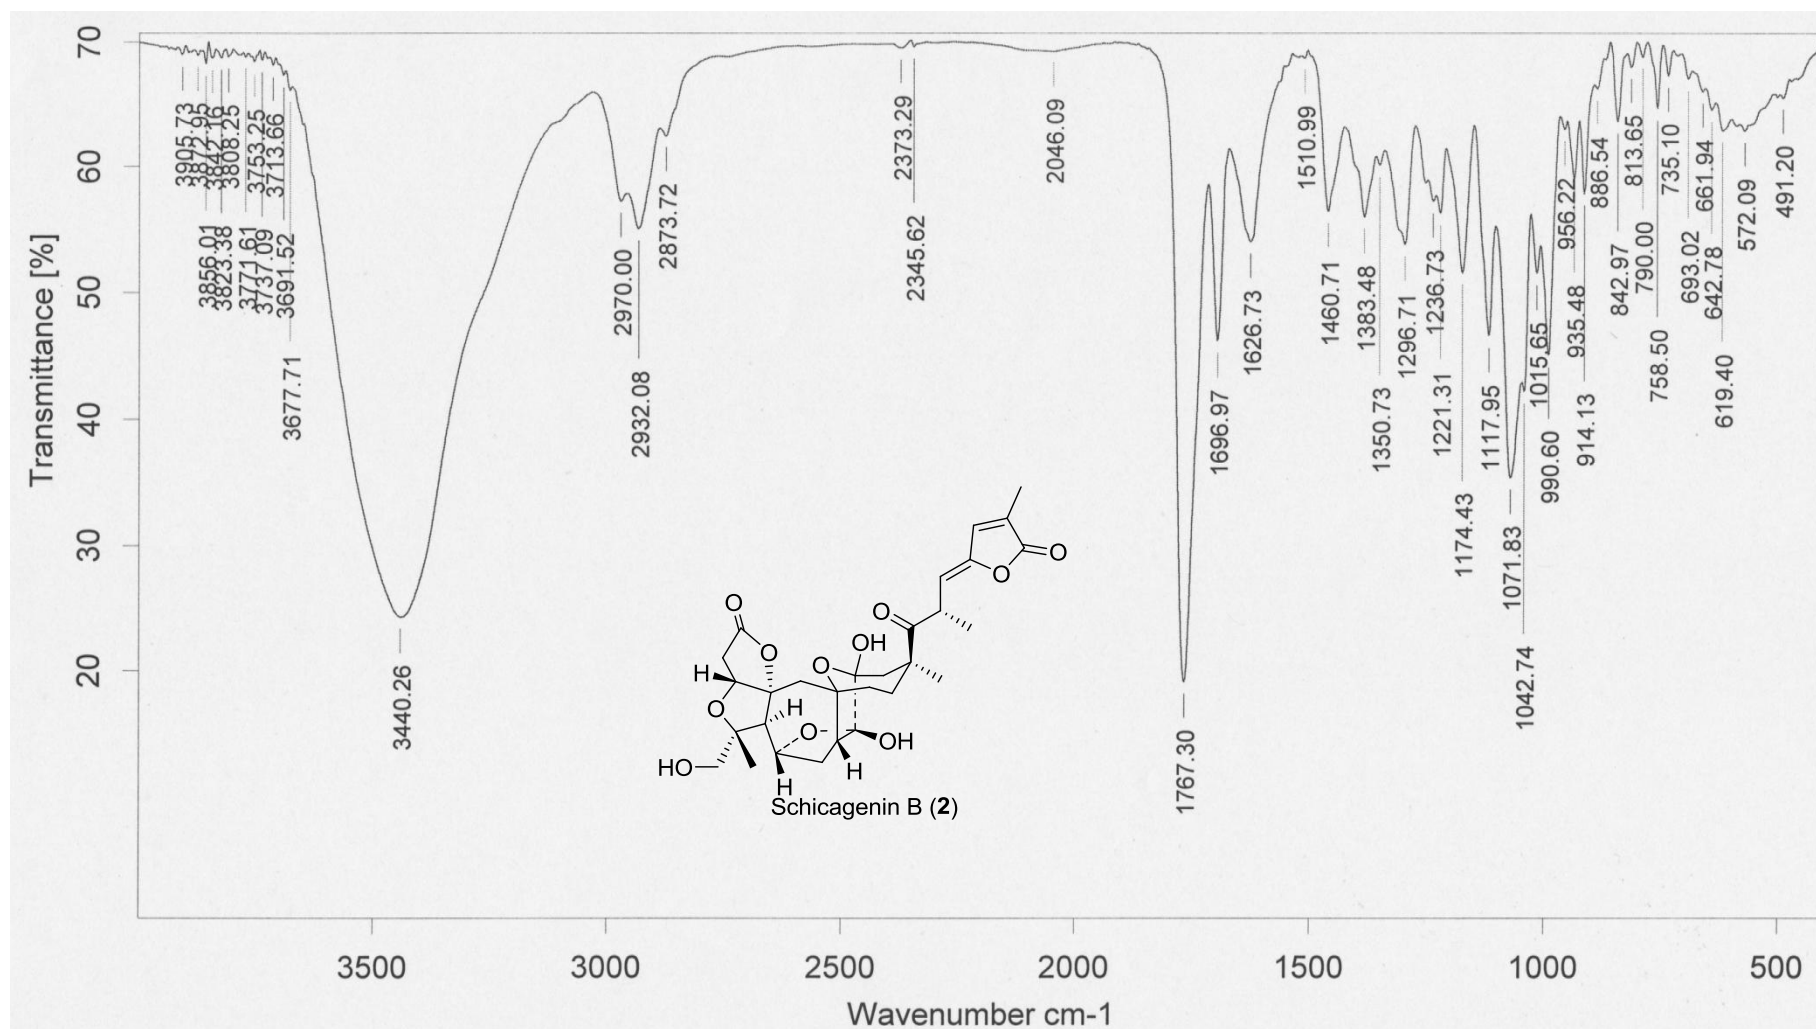

Figure S18. IR spectrum of schicagenin B (2)



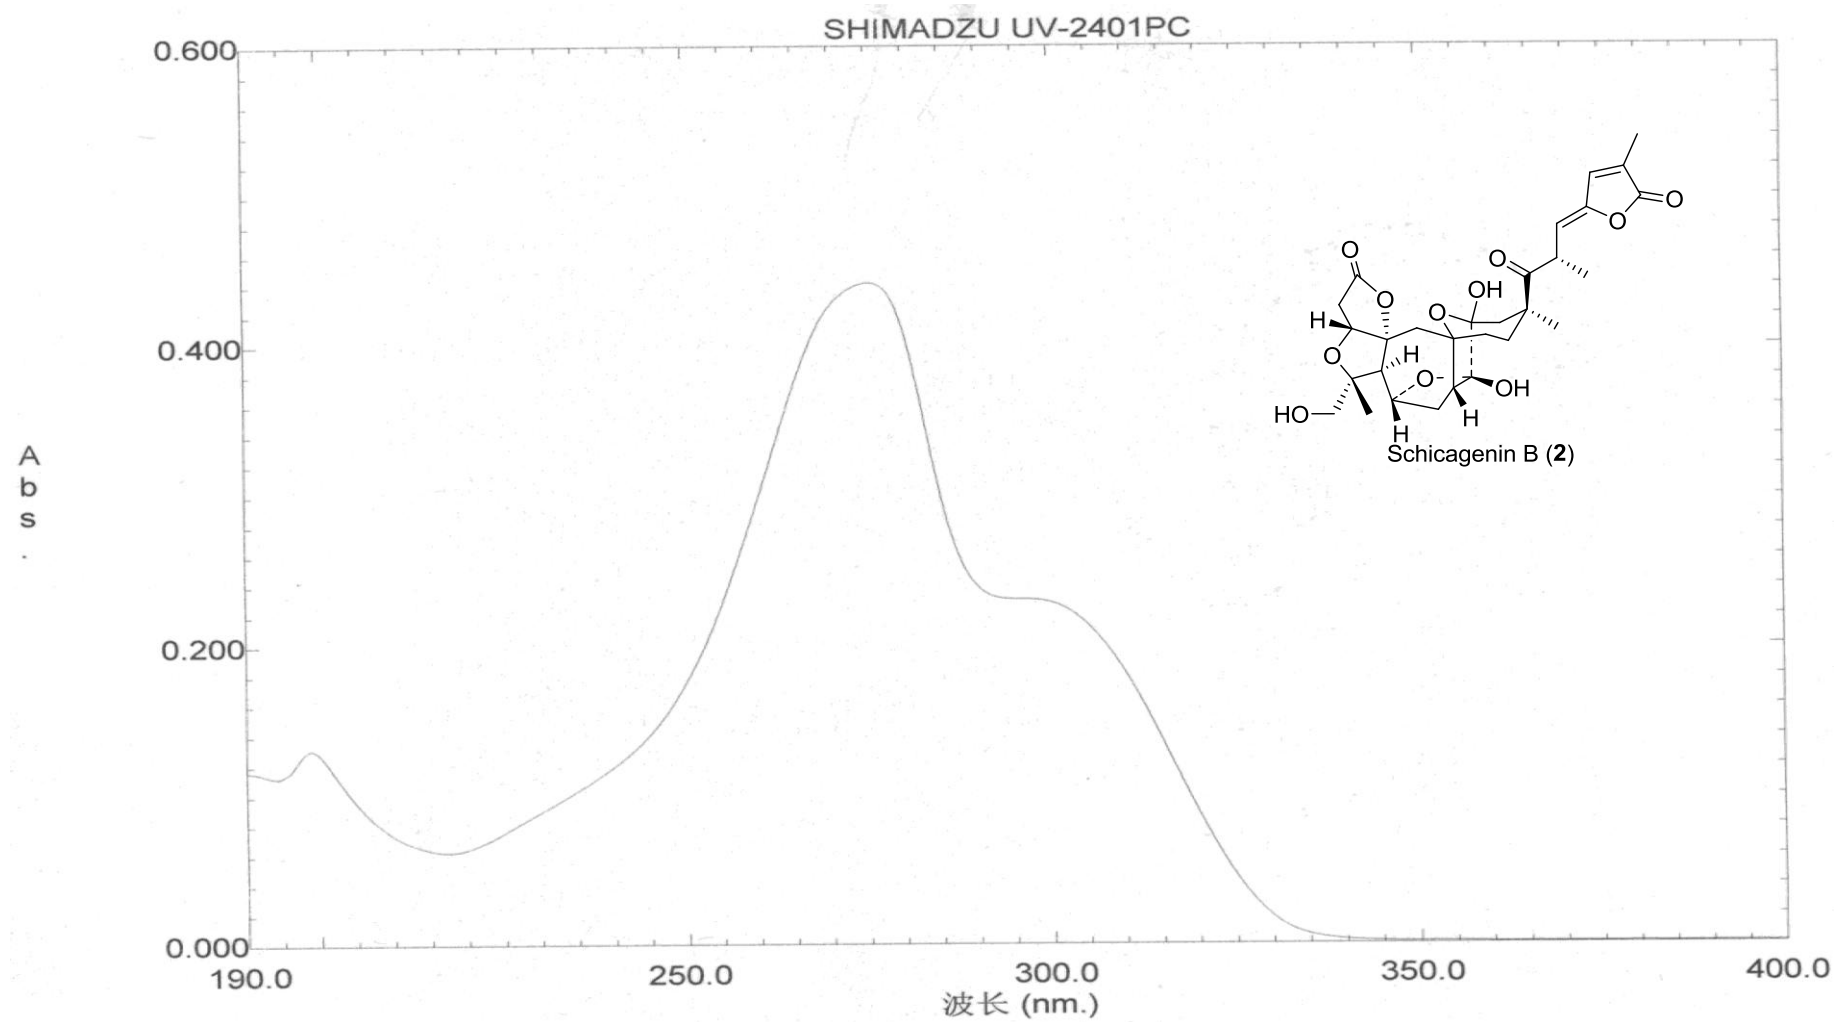

Figure S19. UV spectrum of schicagenin B (2)

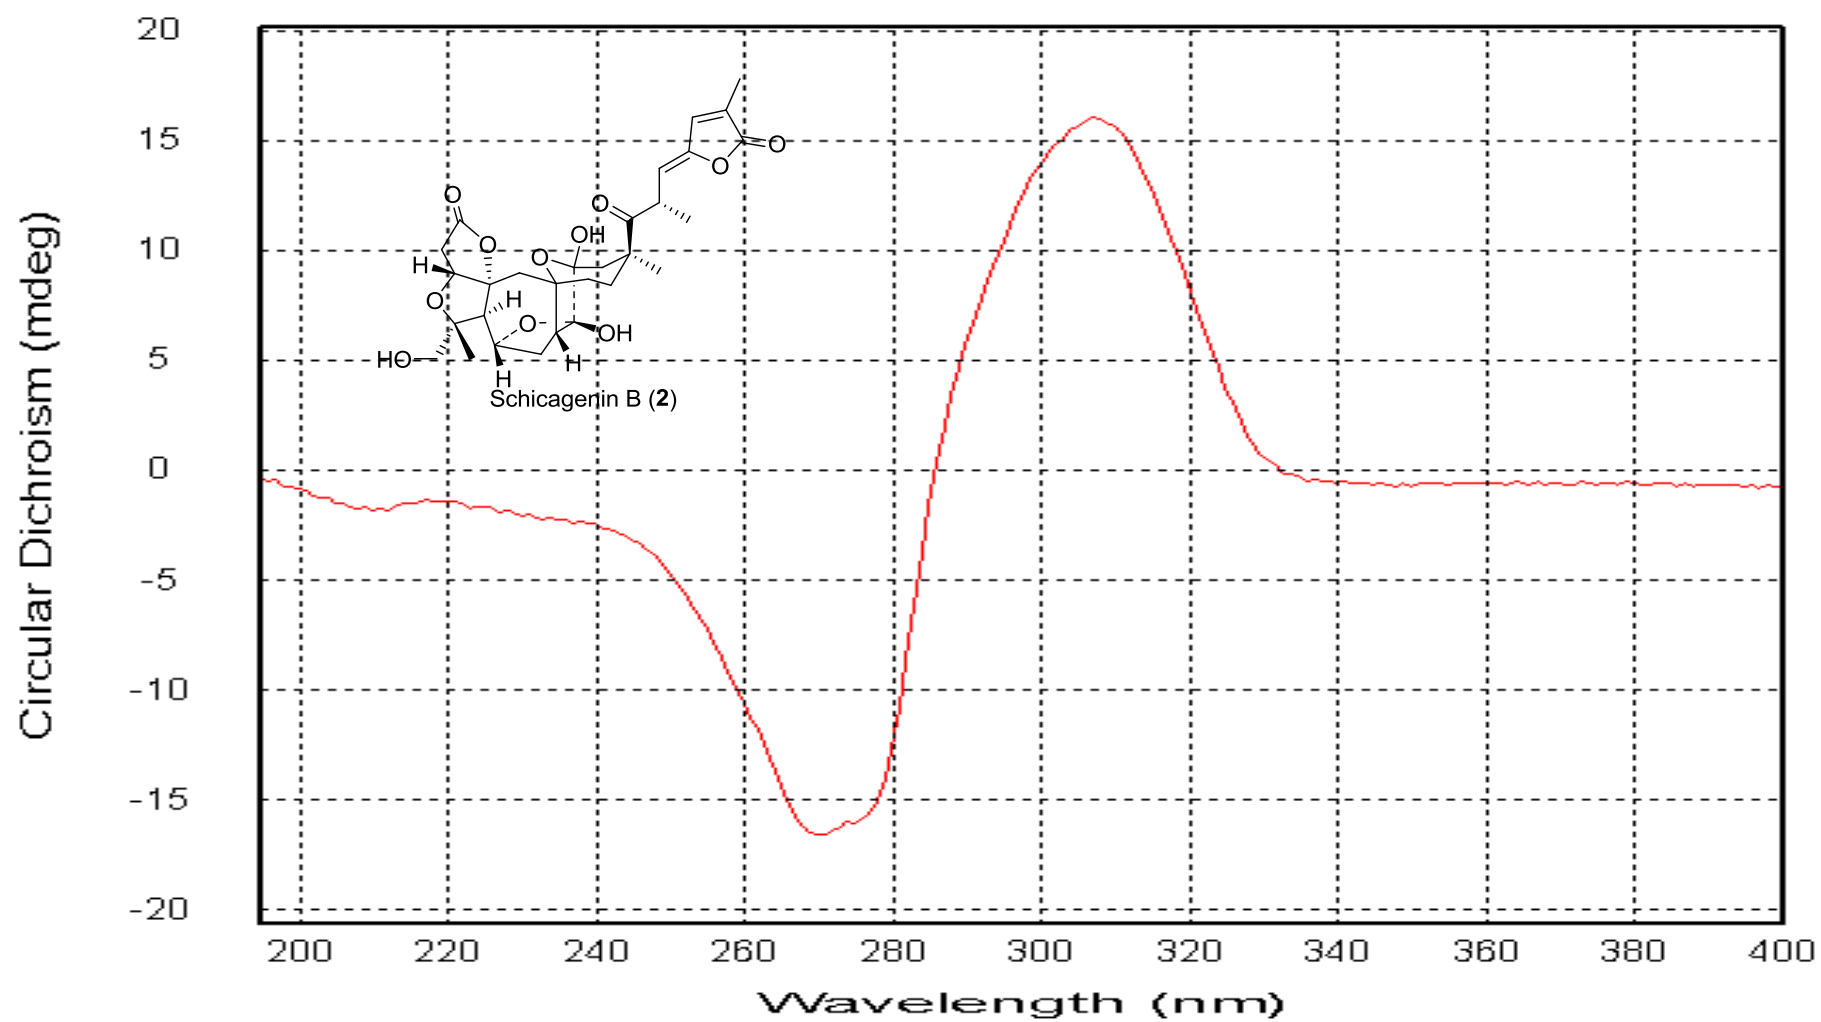

Figure S20. CD spectrum of schicagenin B (2)

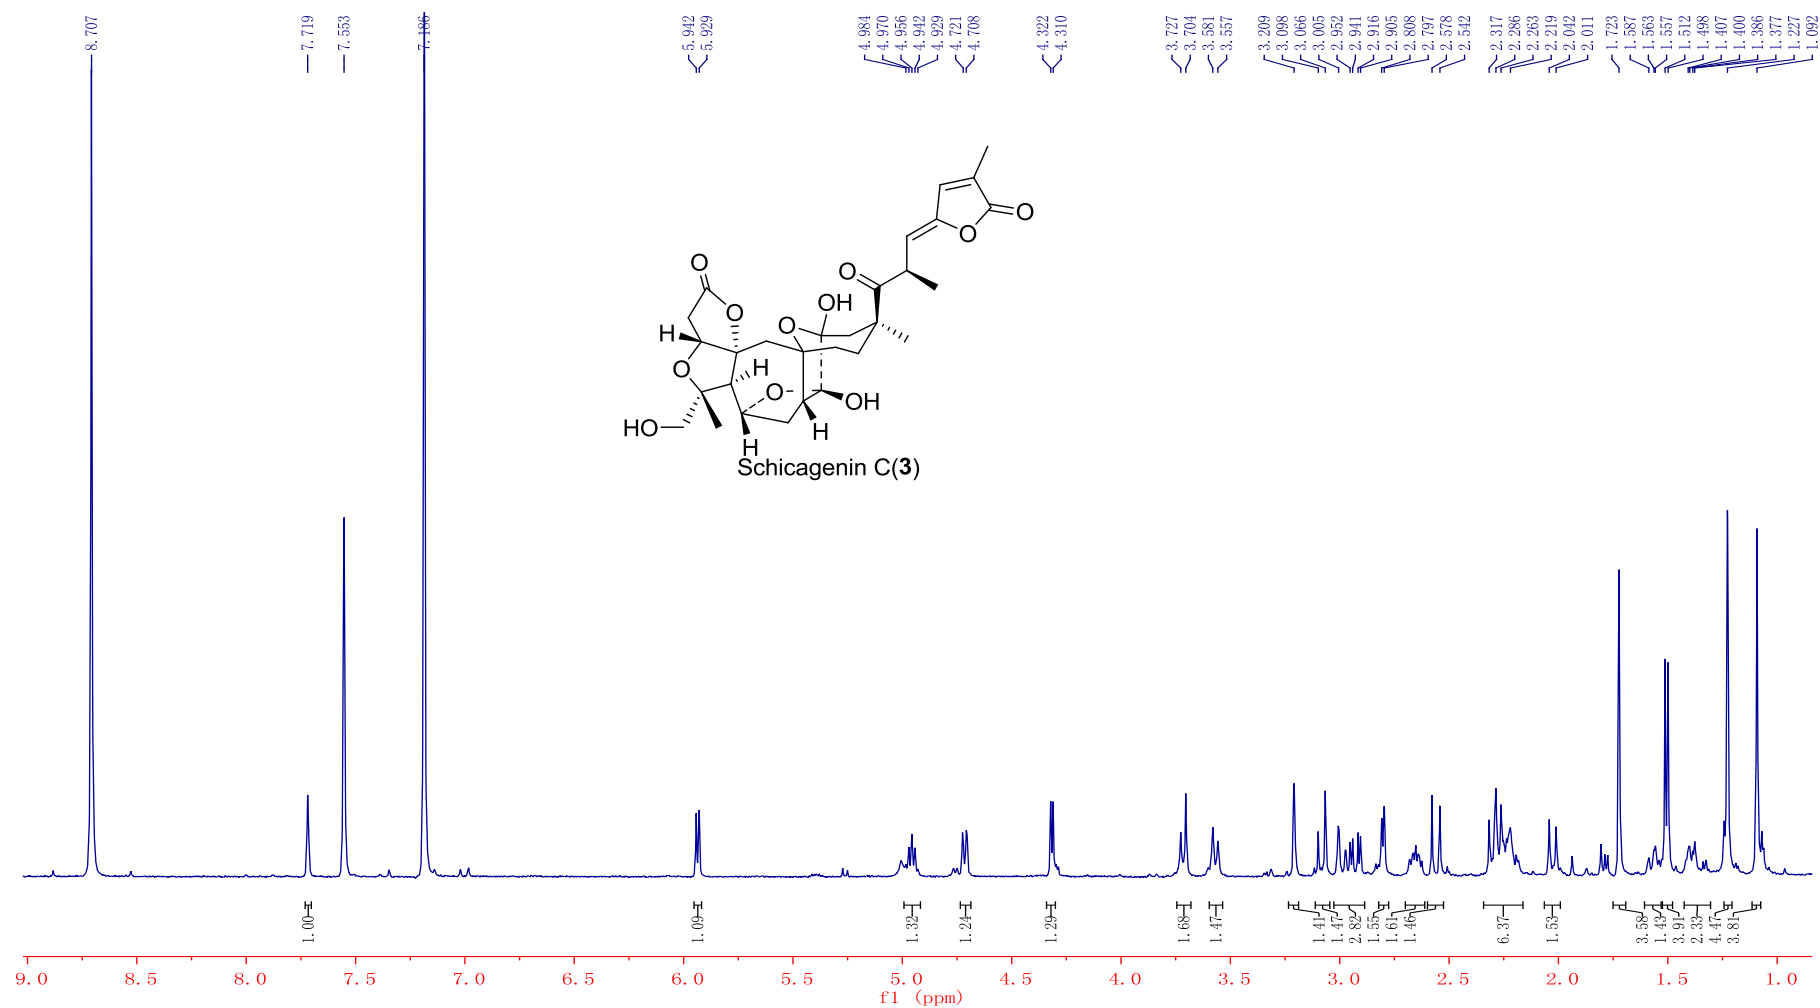

Figure S21.  $^1\text{H}$  NMR spectrum of schicagenin C (3)



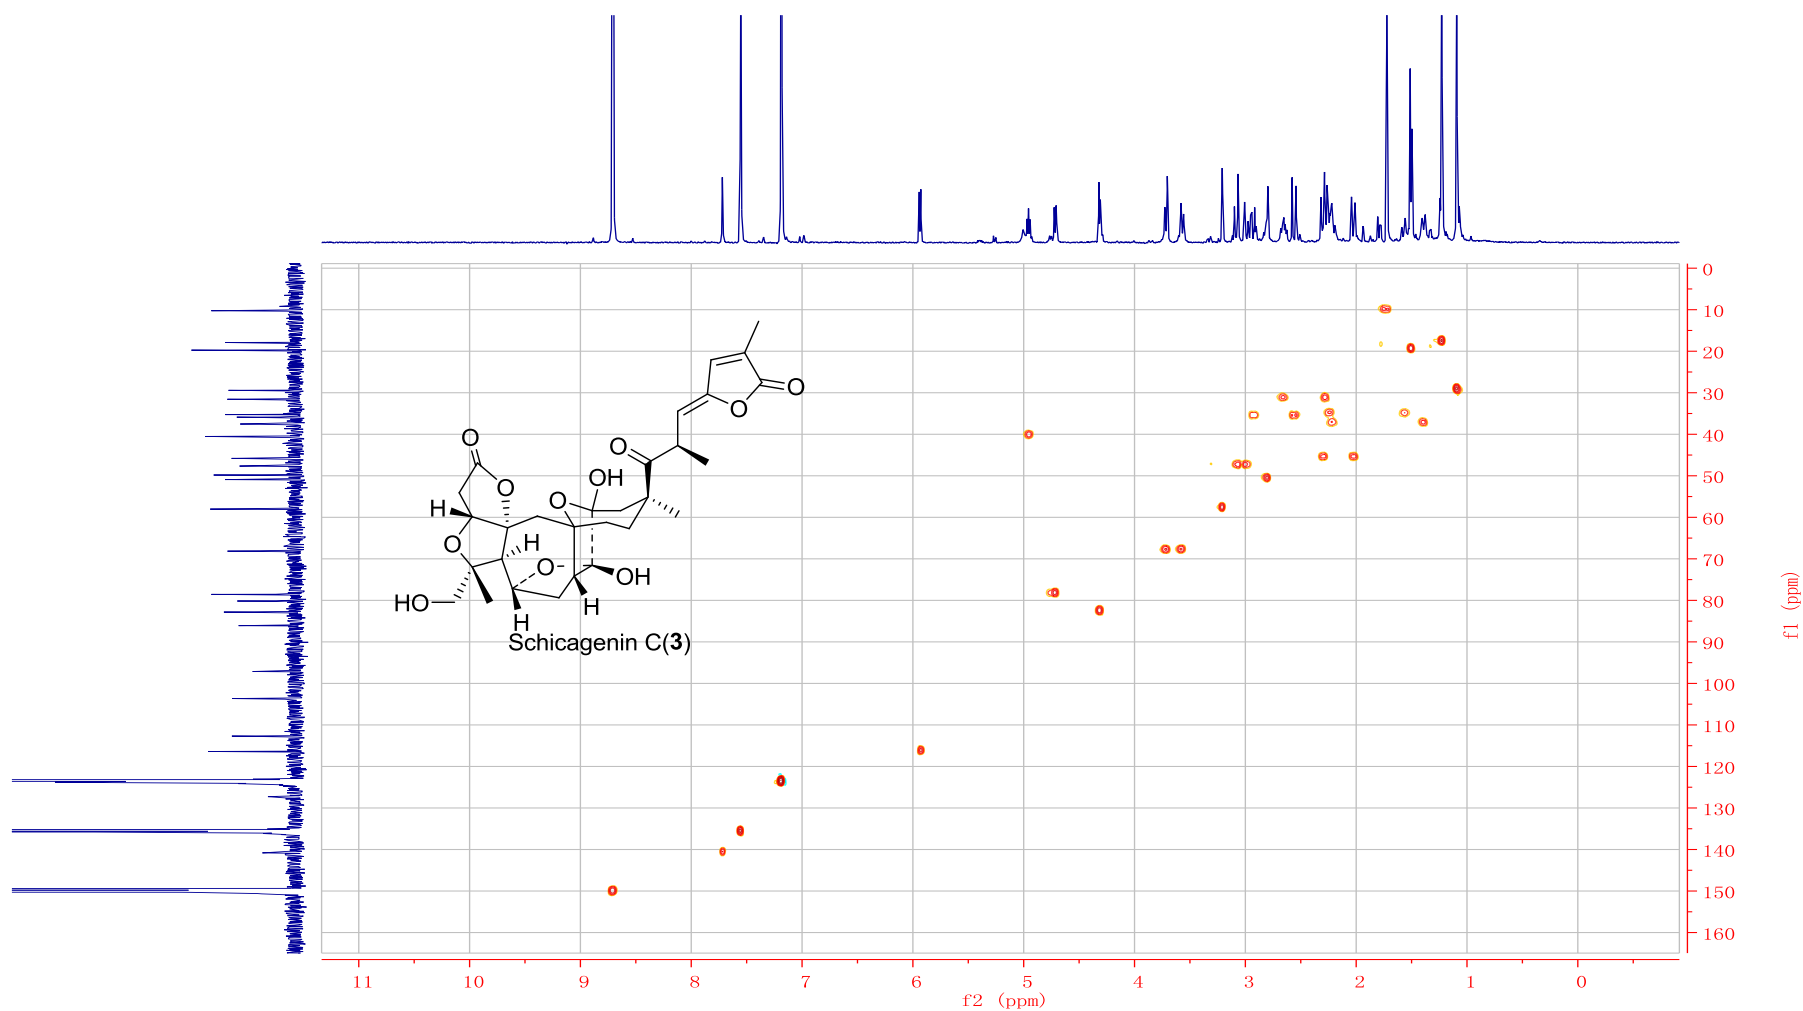

Figure S23. HSQC spectrum of schicagenin C (3)

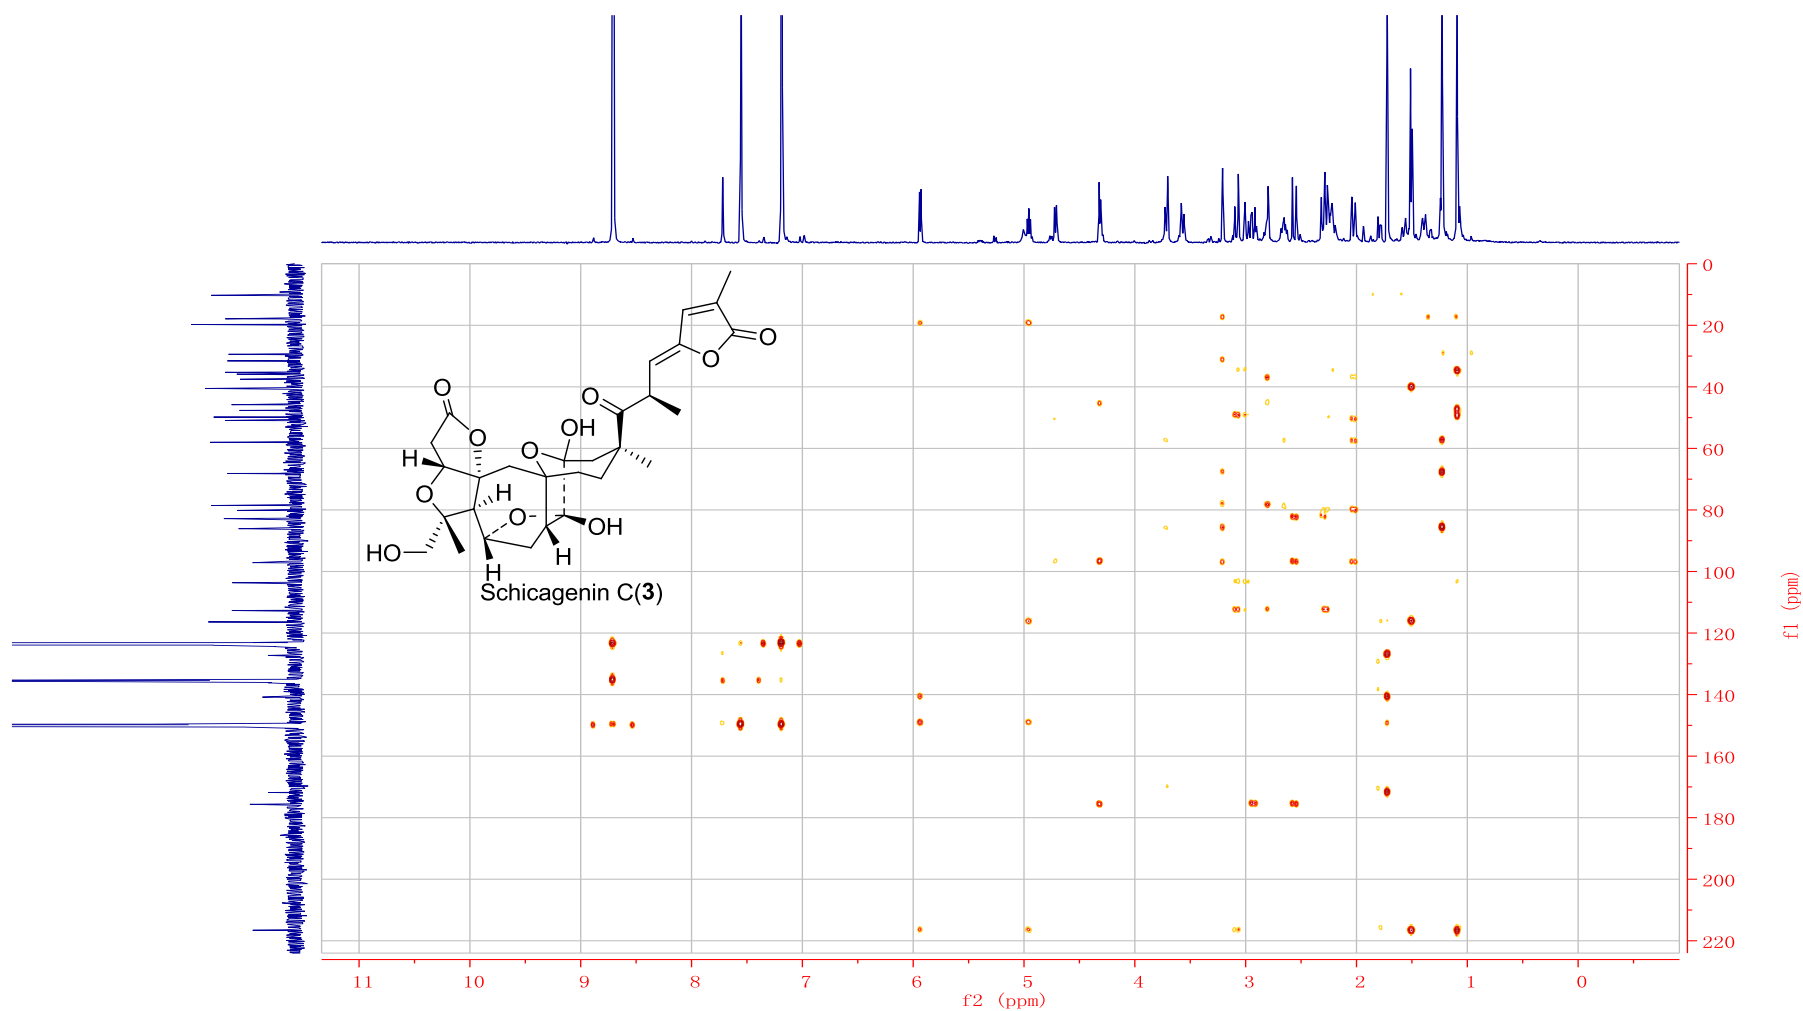

Figure S24. HMBC spectrum of schicagenin C (3)

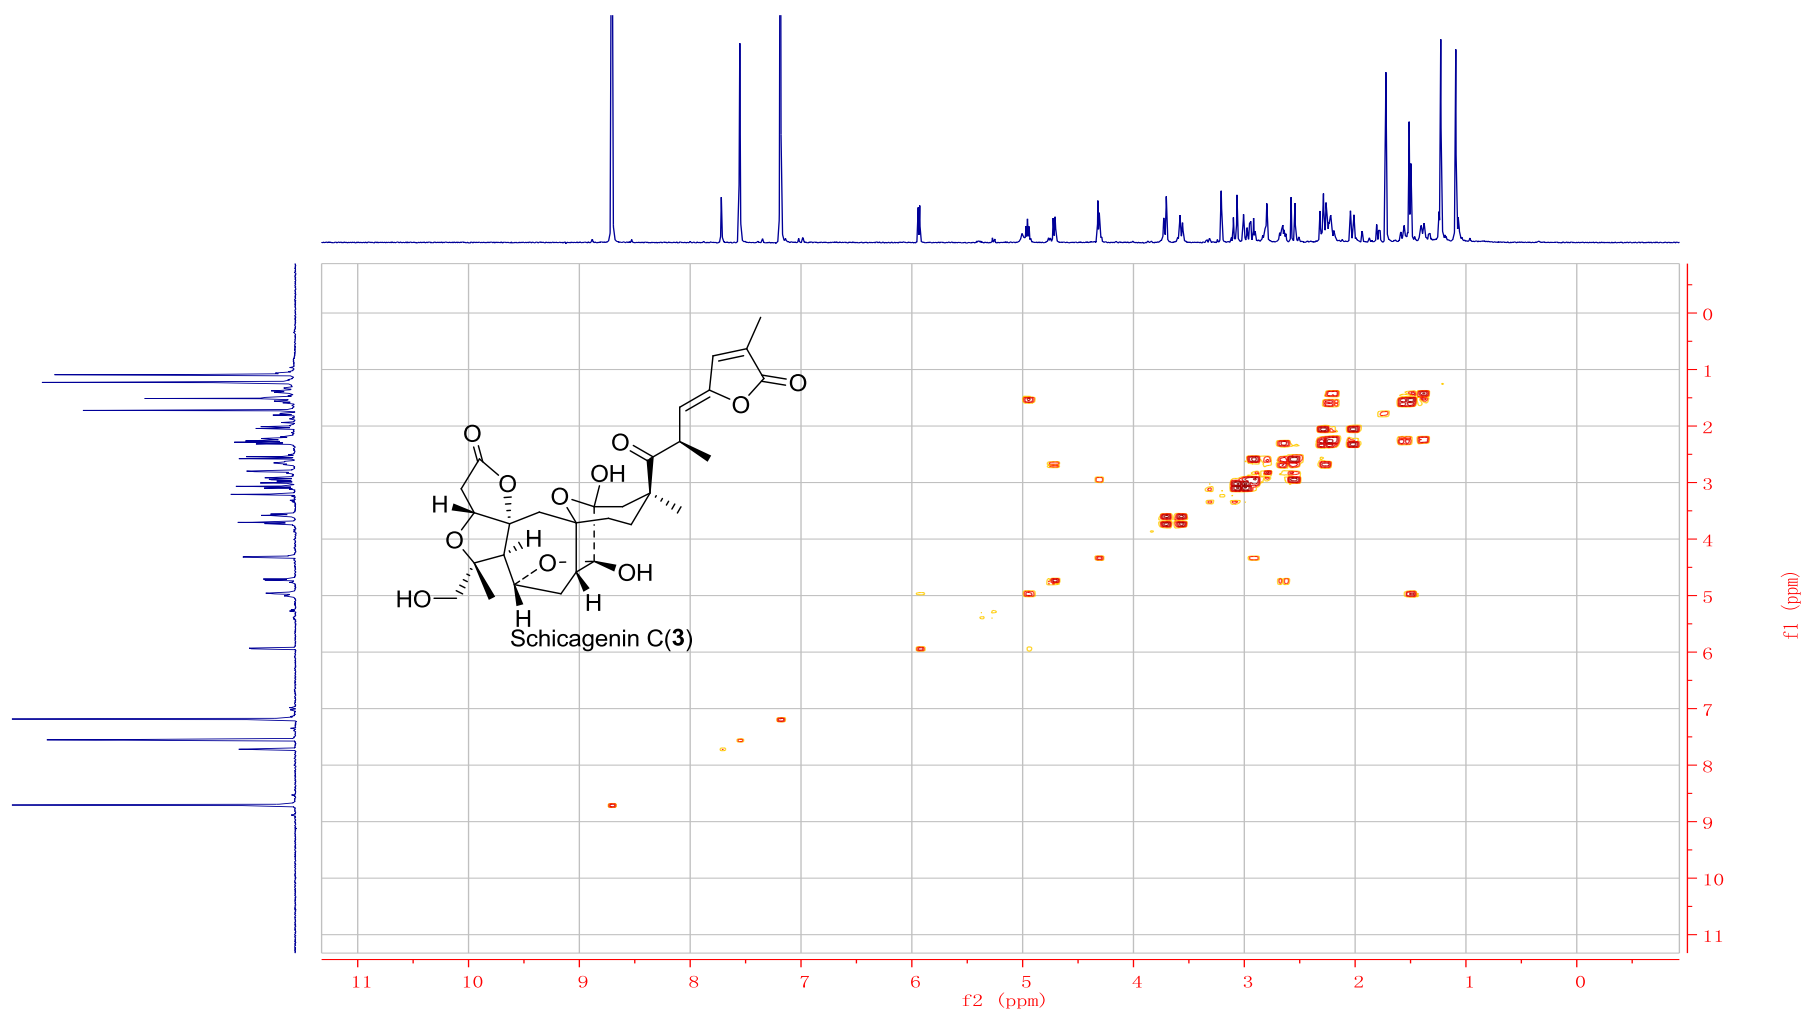

Figure S25.  $^1\text{H}$ - $^1\text{H}$  COSY spectrum of schicagenin C (3)

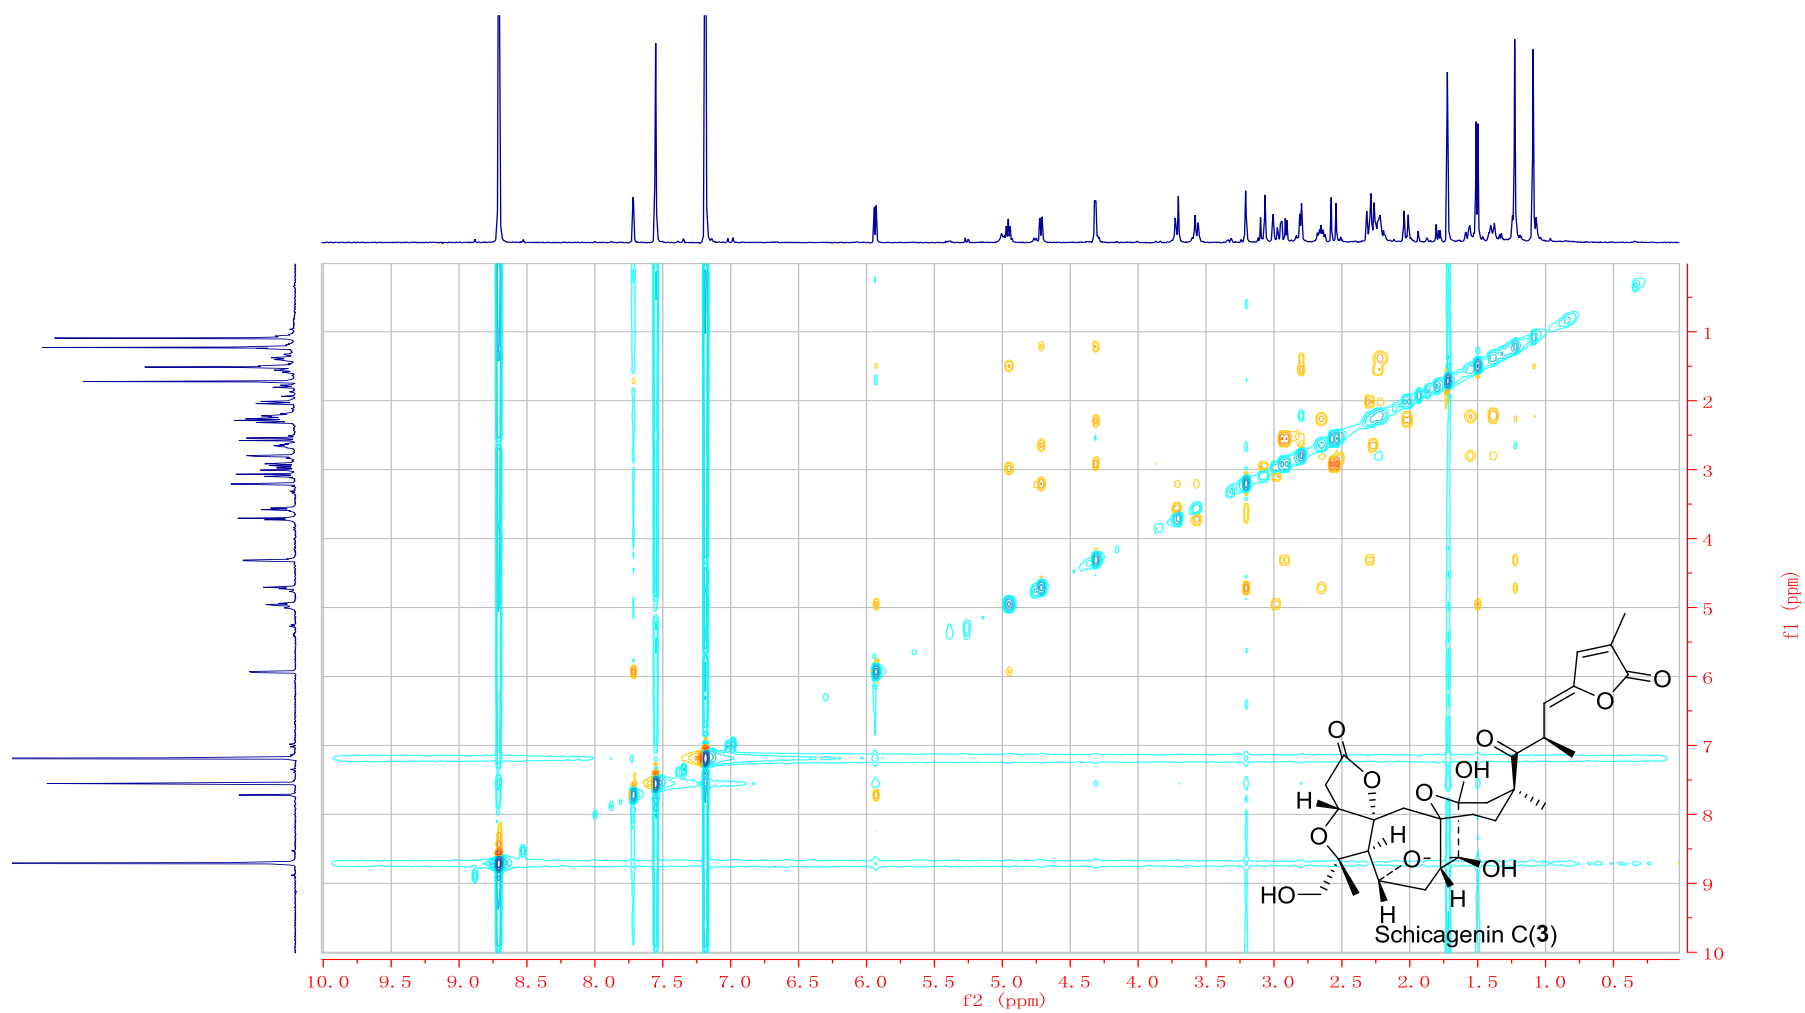

Figure S26. ROESY spectrum of schicagenin C (3)



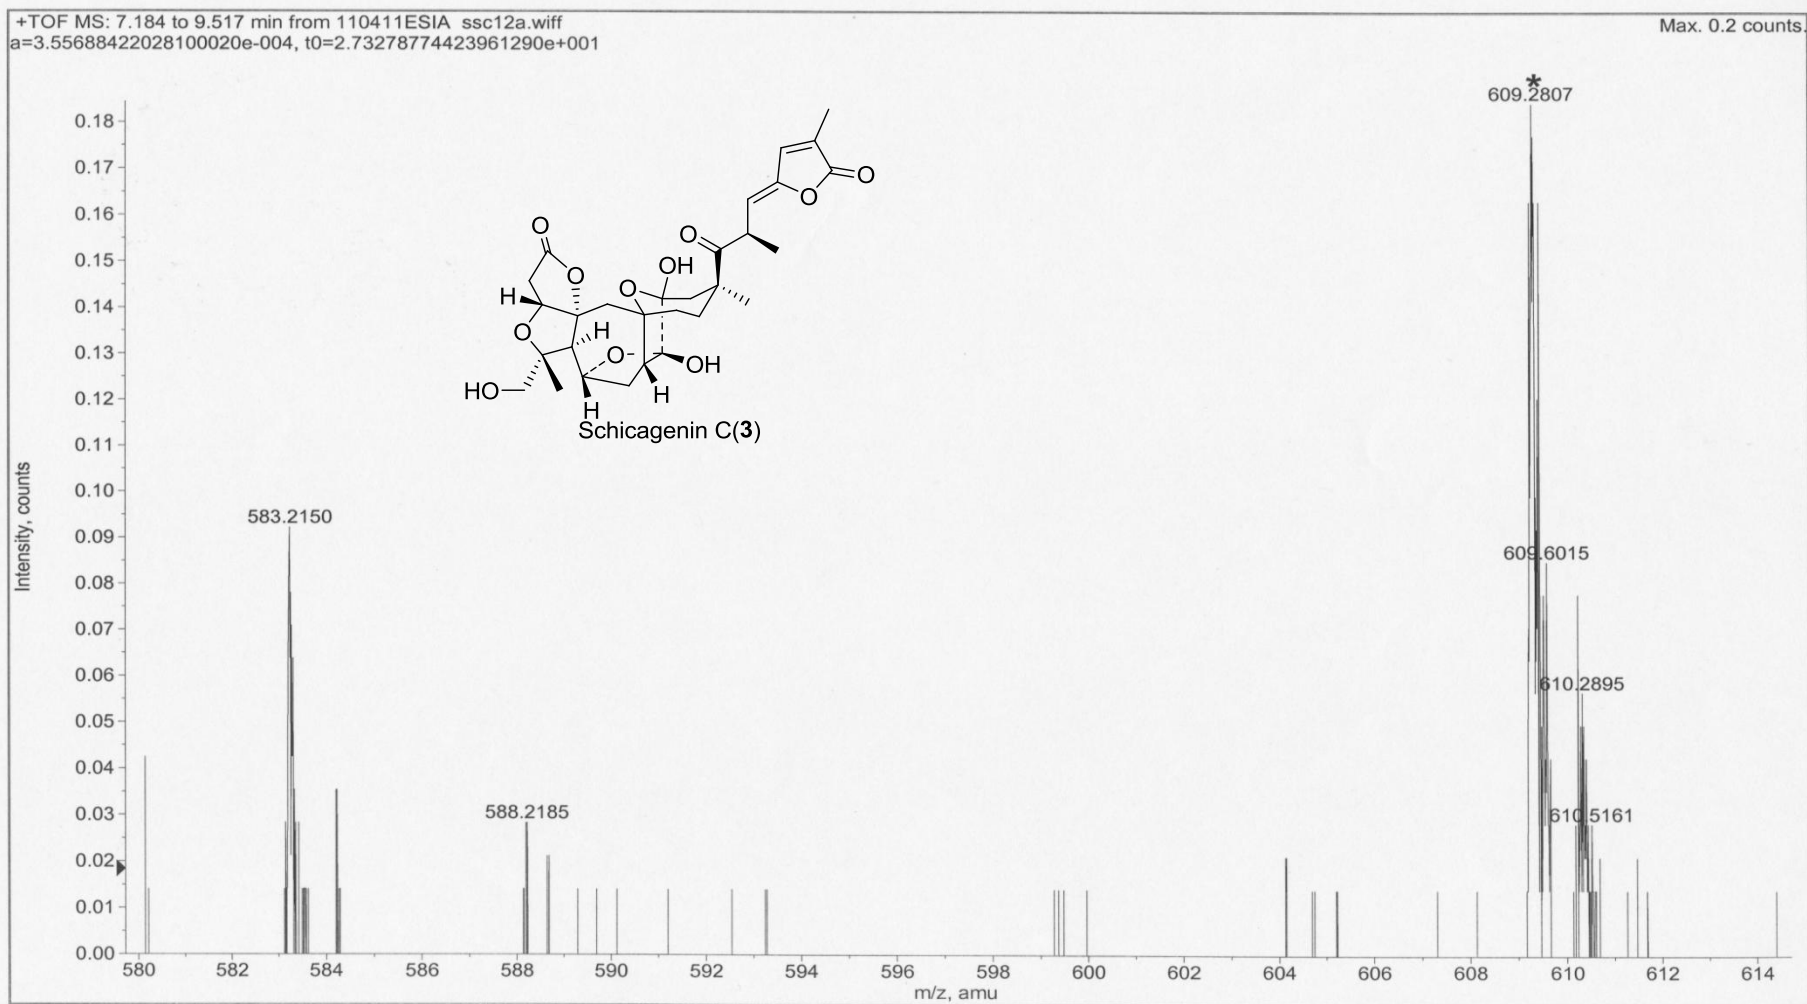

Figure S27. HRESIMS spectrum of schicagenin C (3)



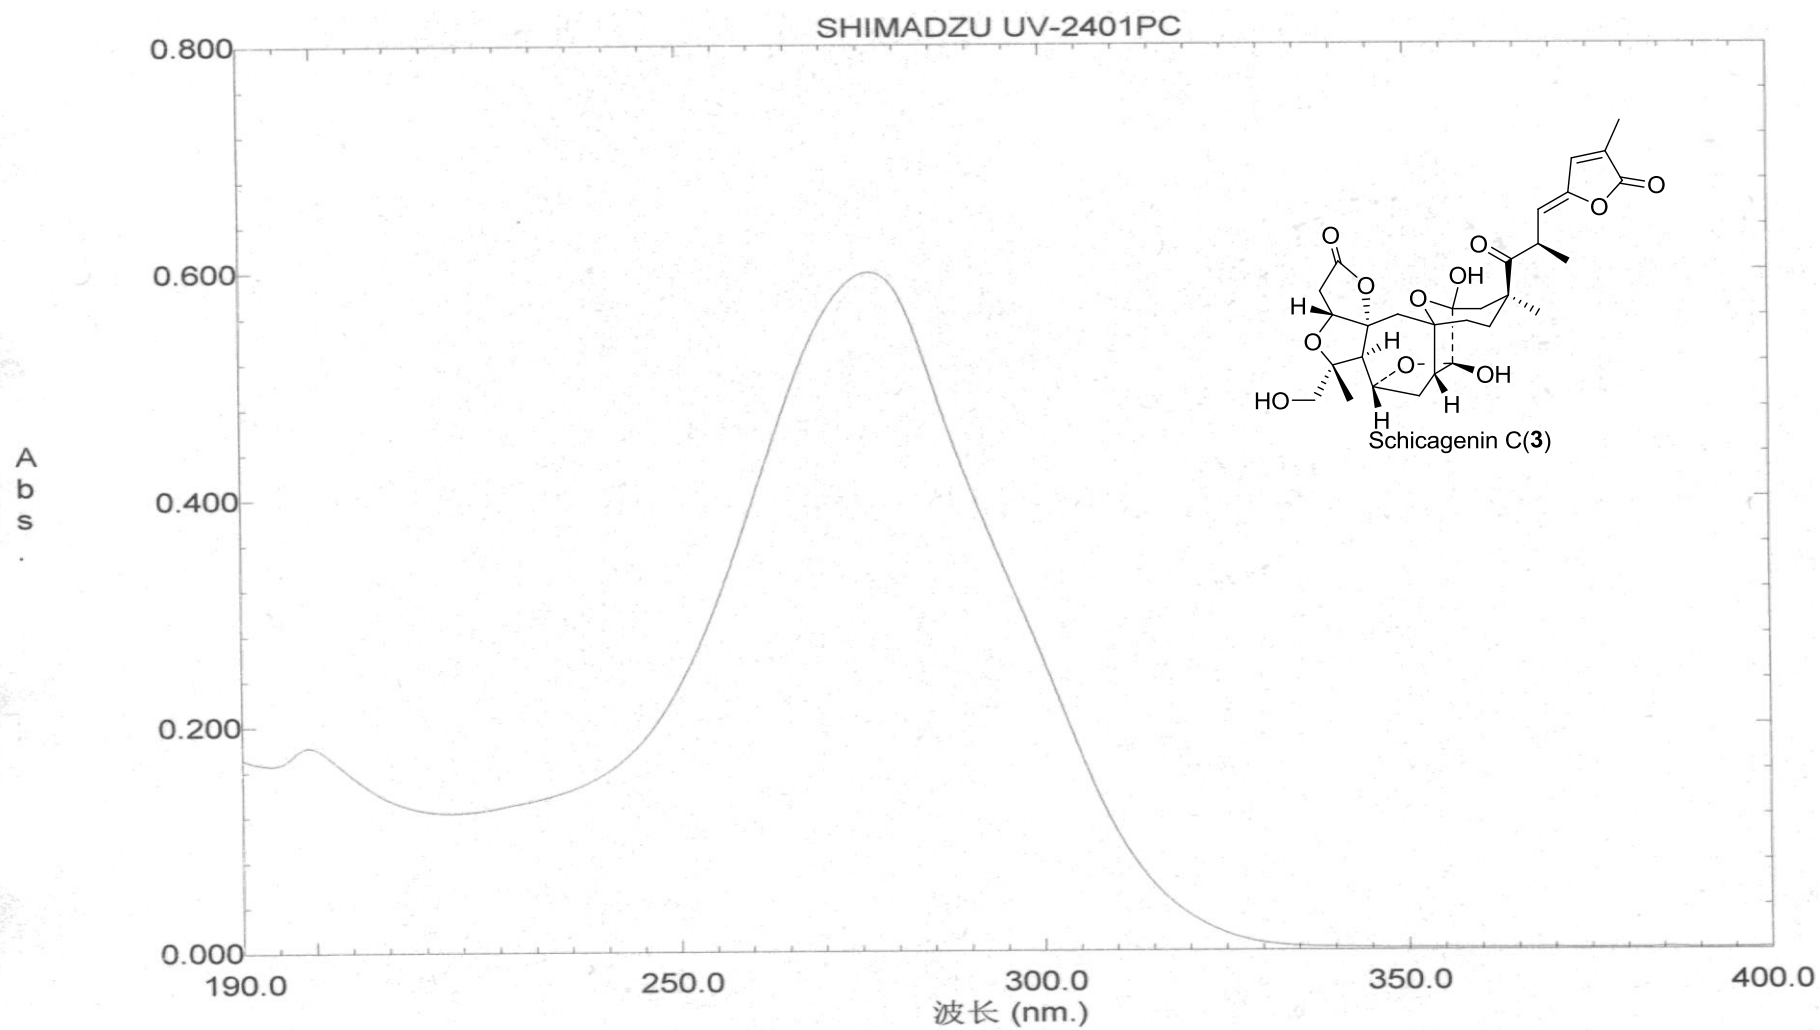

Figure S29. UV spectrum of schicagenin C (3)

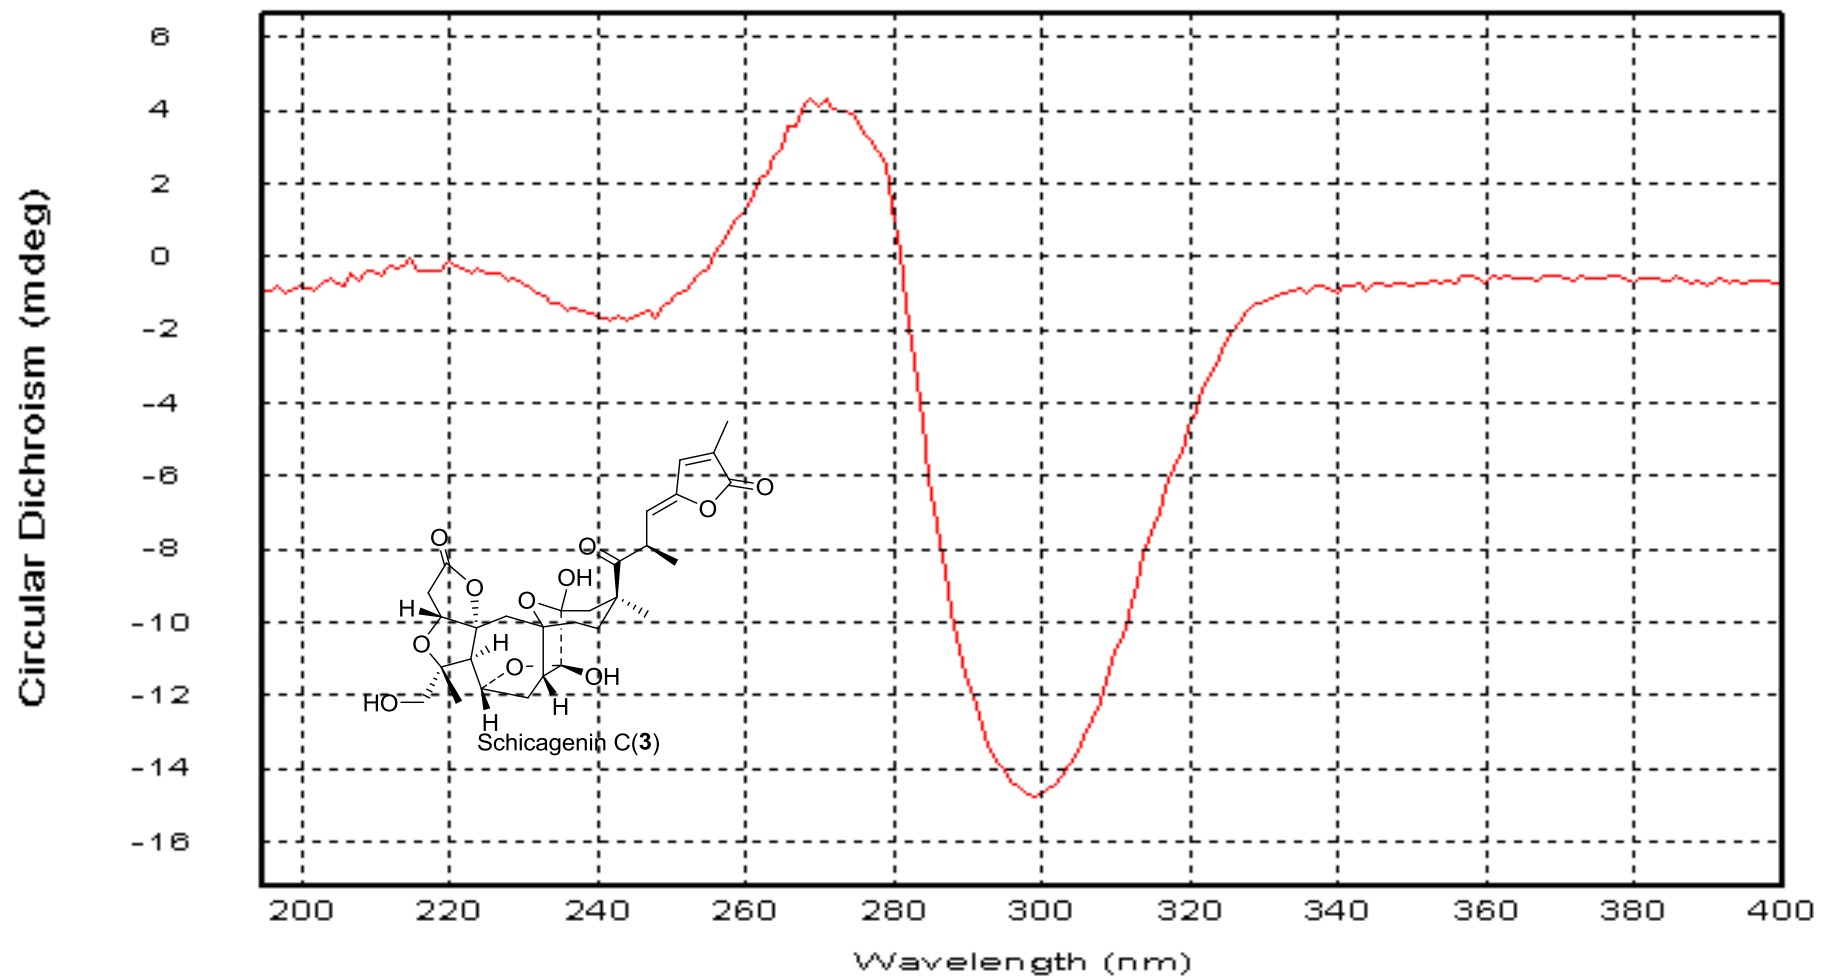

Figure S30. CD spectrum of schicagenin C (3)

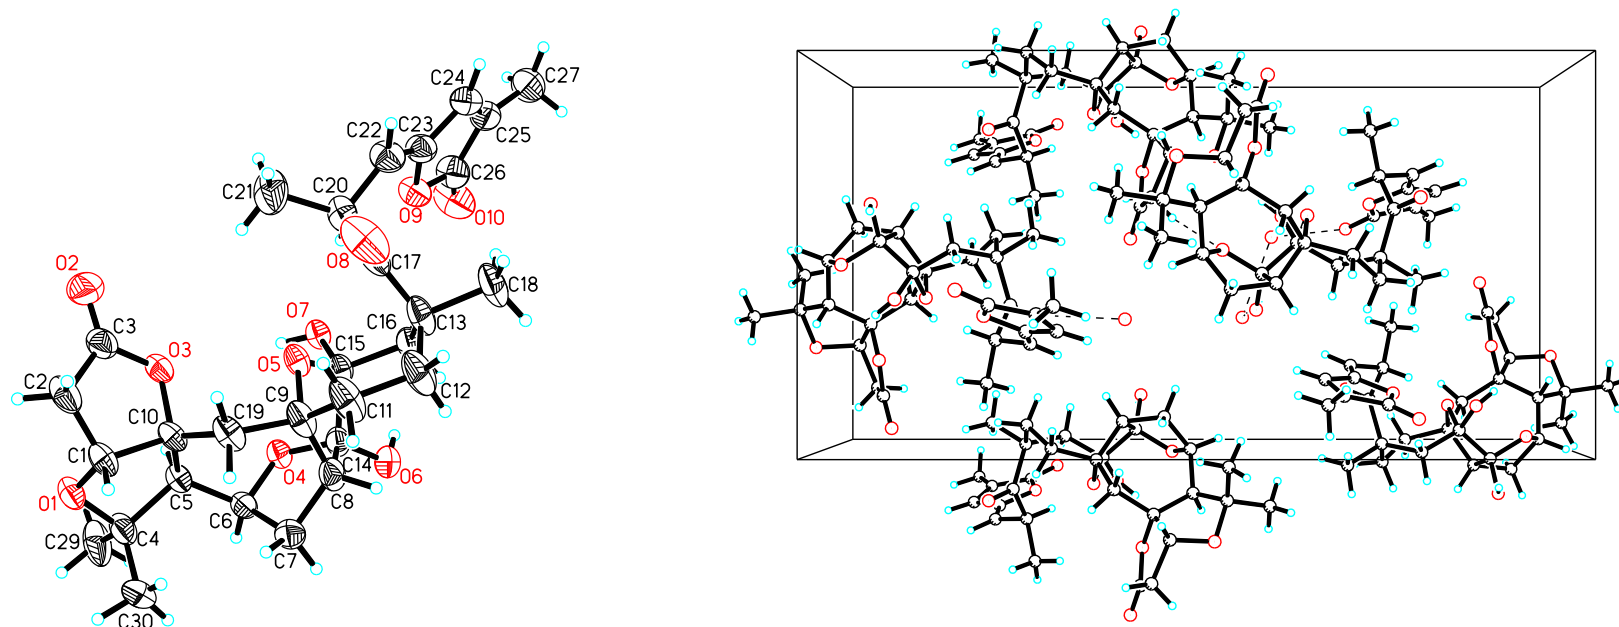

Figure S31. X-ray crystal structure of schicagenin A (**1**)
